# Supplementary material
Source: ML conference proceedings conference paper supplement (https://openreview.net/forum?id=6ugK-RQhIP5)
Supplement: supplementary_material [file attachment]

---

# A Probabilistic Representation for Deep Learning: Delving into The Information Bottleneck Principle

---

Anonymous Author(s)

Affiliation

Address

email

## Abstract

1       The Information Bottleneck (IB) principle has recently attracted great attention to  
2       explaining Deep Neural Networks (DNNs), and the key is to accurately estimate the  
3       mutual information between a hidden layer and dataset. However, some unsettled  
4       limitations weaken the validity of the IB explanation for DNNs. To address these  
5       limitations and fully explain deep learning in an information theoretic fashion, we  
6       propose a probabilistic representation for deep learning that allows the framework  
7       to estimate the mutual information, more accurately than existing non-parametric  
8       models, and also quantify how the components of a hidden layer affect the mutual  
9       information. Leveraging the probabilistic representation, we take into account the  
10      back-propagation training and derive two novel Markov chains to characterize the  
11      information flow in DNNs. We show that different hidden layers achieve different  
12      IB trade-offs depending on the architecture and the position of the layers in DNNs,  
13      whereas a DNN satisfies the IB principle no matter the architecture of the DNN.

## 14   1 Introduction

15   Deep learning [21] has already achieved great success in numerous applications. Deep Neural  
16   Networks (DNNs), however, are still commonly viewed as ‘black boxes’ [32]. Considerable efforts  
17   have been devoted to explaining the internal mechanism of DNNs from various perspectives, such as  
18   mathematics [5, 14], statistics [16, 23, 28], computer vision [43, 25], *etc.* Recently, the Information  
19   Bottleneck (IB) principle has attracted attention in opening the ‘black boxes’ of DNNs [35, 38].

20   Given a joint distribution  $P(X, Y)$ , the IB principle posits a random variable  $T = f(X)$  obeying the  
21   Markov chain  $Y \rightarrow X \rightarrow T$  and optimizes  $T$  by the IB Lagrangian [37, 36]

$$\min_{P(T|X)} I(X; T) - \beta I(Y; T), \quad (1)$$

22   where  $f(\cdot)$  is an arbitrary function,  $I(\cdot; \cdot)$  denotes mutual information, and the Lagrange multiplier  
23    $\beta > 0$  controls the IB trade-off between compressing the input  $X$  and preserving the information  
24   of the label  $Y$ . In the seminal work [35], Tishby *et al.* manifest the IB trade-off in every layer of  
25   DNNs  $= \{\mathbf{x}; \mathbf{t}_1; \dots; \mathbf{t}_L; \hat{\mathbf{y}}\}$  via studying  $I(X; T_i)$  and  $I(Y; T_i)$ , where  $T_i$  is the random variable of  
26   the  $i$ th hidden layer  $\mathbf{t}_i$ . Especially, the authors ascribe DNN generalization to the compression [34].

27   In the context of deterministic DNNs, recent works reveal some limitations of the IB principle for  
28   explaining DNNs. Amjad *et al.* argue that the IB principle becomes an ill-posed optimization problem  
29   due to  $I(X; T_i) = \infty$  [1], and Kolchinsky *et al.* demonstrate that not every layer of DNNs satisfies a  
30   strict IB trade-off, *i.e.*, different layers only differ in  $I(X; T_i)$  but  $I(Y; T_i)$  keeps consistent in all  
31   layers [17]. In addition, Saxe *et al.* experimentally show that the compression does not occur in  
32   DNNs with non-saturating activation functions, *e.g.*, the popular ReLU function [33], and Goldfeld  
33   *et al.* doubt the causality between the generalization of DNNs and the compression [11, 7]. These  
34   unsettled limitations greatly weakens the validity of the IB explanations for DNNs.

35 The key to examining the IB principle in DNNs is the accurate estimation of the mutual information.  
 36 However, regarding DNNs as deterministic models hinders us from specifying the random variable  
 37  $T_i$  and the distribution  $P(T_i)$ , thus it is difficult to accurately estimate  $I(X; T_i)$  and  $I(Y; T_i)$ . More  
 38 specifically, in the absence of a clear definition of  $T_i$ , simply assuming the activations of  $\mathbf{t}_i$  as the *i.i.d.*  
 39 samples of  $T_i$  induces  $T_i$  being a continuous random variable and  $I(X; T_i) = \infty$  in deterministic  
 40 DNNs (see Appendix C in [33]). The complicated architecture of DNNs makes it challenging to  
 41 specify  $P(T_i)$ . Therefore, most previous works have to indirectly estimate  $P(T_i)$  via non-parametric  
 42 models [40], such as the empirical distribution [35], Kernel Density Estimation (KDE) [33], and  
 43 Gaussian convolution [11]. However, we experimentally confirm that classical non-parametric models  
 44 derives poor mutual information estimation [29, 26] in DNNs, and one reason is because activations  
 45 do not satisfy the *i.i.d.* prerequisite of non-parametric models (see Appendix G). In summary, the  
 46 limitations mainly stem from the lack of an explicit probabilistic representation for deep learning.

47 The IB principle only formulates the information flow in DNNs =  $\{\mathbf{x}, \mathbf{t}_1, \dots, \mathbf{t}_I, \hat{\mathbf{y}}\}$  after training,  
 48 and the corresponding Markov chain (see Fig. 1 in [35])

$$Y \rightarrow X \rightarrow T_1 \cdots \rightarrow T_I \rightarrow \hat{Y} \quad (2)$$

49 indicates that the information of  $Y$  transfers to  $T_i$  in the forward direction and  $T_i$  receives the  
 50 information of  $Y$  only via  $X$ . However, training DNNs by the back-propagation [30] implies that the  
 51 information of  $Y$  transfers to  $T_i$  in the backward direction during training and retains information  
 52 in  $T_i$  after training. Notably, Zhang *et al.* show that a DNN can fit labels well even using Gaussian  
 53 noise as input to train the DNN [44], which implies that  $T_i$  can directly receive the information of  $Y$ .  
 54 Hence, the IB principle does not comprehensively characterize the information flow in DNNs.

55 To address the above limitations and comprehensively explain DNNs in an information theoretic  
 56 fashion, we introduce the probability space  $(\Omega_{T_i}, \mathcal{F}, P_{T_i})$  [6] for the  $i$ th hidden layer  $\mathbf{t}_i$  in DNNs.  
 57 Compared to previous works, the probability space  $(\Omega_{T_i}, \mathcal{F}, P_{T_i})$  enables us to: (i) accurately estimate  
 58  $I(X; T_i)$  and  $I(Y; T_i)$  via specifying  $T_i$  and  $P(T_i)$ , and (ii) quantify the effect of the architecture of  
 59  $\mathbf{t}_i$  and the back-propagation on  $I(X; T_i)$  and  $I(Y; T_i)$  via explicitly modeling all the ingredients of  $\mathbf{t}_i$ ,  
 60 such as the activation function and the weights in a probabilistic way. To the best of our knowledge,  
 61 this is the first time the probability space of a hidden layer in DNNs is as defined.

62 Leveraging  $(\Omega_{T_i}, \mathcal{F}, P_{T_i})$ , we derive information theoretic explanations for DNNs as follows:

- 63 • Two Markov chains<sup>1</sup> characterize the information flow in DNNs =  $\{\mathbf{x}, \mathbf{t}_1, \dots, \mathbf{t}_I, \hat{\mathbf{y}}\}$

$$\begin{aligned} \bar{X} &\rightarrow T_1 \rightarrow \dots \rightarrow T_I \rightarrow \hat{Y} \\ T_1 &\leftarrow \dots \leftarrow T_I \leftarrow \hat{Y} \leftarrow Y. \end{aligned} \quad (3)$$

- 64 • Different hidden layers manifest different IB trade-offs depending on the architecture and  
 65 the position of hidden layers in DNNs.
- 66 • A DNN satisfies the IB principle no matter the architecture of the DNN.

67 **Preliminaries.**  $P(X, Y) = P(X)P(Y|X)$  is an unknown joint distribution between  $X$  and  $Y$ . A  
 68 dataset  $\mathcal{D} = \{(\mathbf{x}^j, y^j) | \mathbf{x}^j \in \mathbb{R}^M, y^j \in \mathbb{Z}\}_{j=1}^J$  consists of  $J$  *i.i.d.* samples generated from  $P(X, Y)$   
 69 with finite  $L$  labels, *i.e.*,  $y^j \in \{1, \dots, L\}$ . In the context of supervised learning, we focus on  
 70 feedforward fully connected DNNs =  $\{\mathbf{x}, \mathbf{t}_1, \dots, \mathbf{t}_I, \hat{\mathbf{y}}\}$ , *i.e.*, Multi-Layer Perceptions (MLPs) [8]  
 71 for the image classification task. Without loss of generality, we use the MLP =  $\{\mathbf{x}, \mathbf{t}_1, \mathbf{t}_2, \hat{\mathbf{y}}\}$  with  
 72 the cross-entropy loss  $\ell_{\text{CE}}$  for most theoretical derivations. In addition,  $H(\cdot)$  denotes entropy.

73 In the MLP,  $\mathbf{t}_1$  and  $\mathbf{t}_2$  have  $N$  and  $K$  neurons, respectively, and  $\mathbf{t}_1 = \{t_{1n} = \sigma_1[\langle \boldsymbol{\omega}_n^{(1)}, \mathbf{x} \rangle]\}_{n=1}^N$ ,  
 74 where  $\langle \boldsymbol{\omega}_n^{(1)}, \mathbf{x} \rangle = \sum_{m=1}^M \omega_{mn}^{(1)} \cdot x_m + b_{1n}$  is the  $n$ th dot-product given the weight  $\omega_{mn}^{(1)}$  and the bias  
 75  $b_{1n}$ , and  $\sigma_1(\cdot)$  denotes an activation function, *e.g.*, ReLU. Similarly,  $\mathbf{t}_2 = \{t_{2k} = \sigma_2[\langle \boldsymbol{\omega}_k^{(2)}, \mathbf{t}_1 \rangle]\}_{k=1}^K$ ,  
 76 where  $\langle \boldsymbol{\omega}_k^{(2)}, \mathbf{t}_1 \rangle = \sum_{n=1}^N \omega_{nk}^{(2)} \cdot t_{1n} + b_{2k}$ . The output layer  $\hat{\mathbf{y}}$  is softmax with  $L$  nodes

$$\hat{\mathbf{y}} = \{\hat{y}_l = \frac{1}{Z_Y} \exp[\langle \boldsymbol{\omega}_l^{(3)}, \mathbf{t}_2 \rangle] = \frac{1}{Z_Y} \exp[g_l(\mathbf{t}_2(\mathbf{t}_1(\mathbf{x})))]\}_{l=1}^L, \quad (4)$$

77 where  $\langle \boldsymbol{\omega}_l^{(3)}, \mathbf{t}_2 \rangle = \sum_{k=1}^K \omega_{kl}^{(3)} \cdot t_{2k} + b_{yl}$  and  $Z_Y = \sum_{l=1}^L \exp[\langle \boldsymbol{\omega}_l^{(3)}, \mathbf{t}_2 \rangle]$  is the partition function.

<sup>1</sup>In which the virtual random variable  $\bar{X}$  has all the information of  $X$  except  $Y$ , namely  $H(\bar{X}) = H(X|Y)$ .

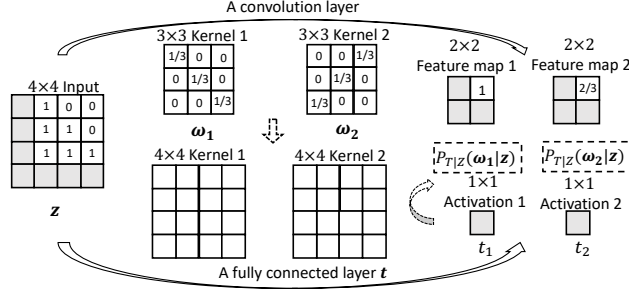

Figure 1: Given a  $4 \times 4$  input  $z$ , a fully connected layer  $t$  is equivalent to a convolution layer with  $4 \times 4$  convolution kernels. The definition of convolution (Chapter 9.1 in [12]) implies that the  $4 \times 4$  weights  $\omega_1$  and  $\omega_2$  define two global features, and the two activations  $t_1, t_2$  indicate the cross-correlation between  $\omega_1, \omega_2$  and  $z$ , respectively.  $P_{T|Z}(\omega_1|z)$  and  $P_{T|Z}(\omega_2|z)$  measure the probability of  $\omega_1$  and  $\omega_2$  being recognized as the feature with the largest cross-correlation to  $z$ , respectively.

## 78 2 A probabilistic representation for deep learning

79 To accurately estimate  $I(X; T_i)$  and  $I(Y; T_i)$ , in this section, we specify the probability space [6] for  
80 a fully connected layer and derive the probabilistic explanations of the entire MLP.

81 It is known that a convolution kernel (namely the weights of convolution) defines a local feature,  
82 and a convolution operation derives a feature map to measure the cross-correlation between the  
83 local feature and input in a receptive field (Chapter 9.1 in [12]). Notably, a fully connected layer  
84 is equivalent to a convolution layer with the kernel size having the same dimension as input. Thus  
85 the weights of a neuron can be viewed as a global feature, and a fully connected layer with multiple  
86 neurons derives activations to measure the cross-correlation between the multiple global features and  
87 the input. The cross-correlation explanation for a fully connected layer is visualized in Figure 1.

88 Assuming that a fully connected layer  $t$  consists of  $N$  neurons  $\{t_n = \sigma[\langle \omega_n, z \rangle]\}_{n=1}^N$ , where  $z \in \mathbb{R}^M$   
89 is the input of  $t$ ,  $\langle \omega_n, z \rangle = \sum_{m=1}^M \omega_{mn} \cdot z_m + b_n$  is the dot-product between  $z$  and  $\omega_n$ , and  $\sigma(\cdot)$   
90 is an activation function. Based on the cross-correlation explanation, the behavior of  $t$  is to measure  
91 the cross-correlations between  $z$  and the  $N$  possible features defined by the the weights  $\{\omega_n\}_{n=1}^N$ .  
92 In the context of pattern recognition [39], we define a virtual random process or ‘experiment’ as  $t$   
93 recognizing one of the patterns/features with the largest cross-correlation to  $z$  from the  $N$  possible  
94 features. The experiment characterizes the behavior of  $t$  (*i.e.*, before recognizing the features with  
95 the largest cross-correlation,  $t$  must measure the cross-correlations between  $z$  and all the  $N$  possible  
96 features) while meets the requirement of the ‘experiment’ definition (*i.e.*, only one outcome will  
97 occur on each trial of the experiment [6]). The probability space  $(\Omega_T, \mathcal{F}, P_T)$  is defined as follows:

98 **Definition 1.**  $(\Omega_T, \mathcal{F}, P_T)$  consists of three components: the sample space  $\Omega_T$  has  $N$  possible  
99 outcomes (features)  $\{\omega_n = \{\omega_{mn}\}_{m=1}^M\}_{n=1}^N$  defined by the weights<sup>2</sup> of the  $N$  neurons; the event  
100 space  $\mathcal{F}$  is the  $\sigma$ -algebra; and the probability measure  $P_T$  is a Gibbs distribution [22] to quantify the  
101 probability of  $\omega_n$  being recognized as the feature with the largest cross-correlation to  $z$ .

102 Taking into account the randomness of  $z$ , the conditional distribution  $P_{T|Z}$  is formulated as

$$P_{T|Z}(\omega_n|z) = \frac{1}{Z_T} \exp(t_n) = \frac{1}{Z_T} \exp[\sigma(\langle \omega_n, z \rangle)], \quad (5)$$

103 where  $Z$  is the random variable of  $z$  and  $Z_T = \sum_{n=1}^N \exp(t_n)$  is the partition function.

104  $(\Omega_T, \mathcal{F}, P_T)$  clearly explains all the ingredients of  $t$  in a probabilistic fashion. The  $n$ th neuron  
105 defines a global feature by the weights  $w_n$  and the activation  $t_n = \sigma(\langle \omega_n, z \rangle)$  measures the cross-  
106 correlation between  $w_n$  and  $z$ . The Gibbs distribution  $P_{T|Z}$  indicates that if  $w_n$  has the higher  
107 activation, *i.e.*, the larger cross-correlation to  $z$ , it has the larger probability being recognized as  
108 the feature with largest cross-correlation to  $z$ . For instance, if  $z \in \mathbb{R}^{16}$  and  $t$  includes  $N = 2$   
109 neurons, then  $\Omega_T = \{\omega_1, \omega_2\}$  defines two possible outcomes (features), where  $\omega_n = \{\omega_{mn}\}_{m=1}^{16}$ .  
110  $\mathcal{F} = \{\emptyset, \{\omega_1\}, \{\omega_2\}, \{\omega_1, \omega_2\}\}$  means that neither, one, or both of the features are recognized  
111 by  $t$  given  $z$ , respectively.  $P_{T|Z}(\omega_1|z)$  and  $P_{T|Z}(\omega_2|z)$  are the probability of  $\omega_1$  and  $\omega_2$  being  
112 recognized as the feature with the largest cross-correlation to  $z$ , respectively.

<sup>2</sup>We do not take into account the scalar value  $b_n$  for defining  $\Omega_T$ , as it not affects the feature defined by  $\omega_n$ .

113  $(\Omega_T, \mathcal{F}, P_T)$  explains the representation ability of deep learning. Compared to Restricted Boltzmann  
 114 Machines (RBMs) [31] simply using binary units to indicate features being recognized or not given  
 115 input, the Gibbs distribution<sup>3</sup>  $P_{T|Z}(\omega_n|z)$  measures the probability of  $\omega_n$  being recognized with  
 116 the largest cross-correlation to  $z$ , *i.e.*, it characterizes the relation between features and input more  
 117 accurately. Moreover, Equation 5 shows that  $t_n = \sigma(\langle \omega_n, z \rangle)$  is the negative energy function [22] of  
 118 the Gibbs distribution, thus  $P_{T|Z}(\omega_n|z)$  can be derived as long as  $\sigma(\langle \omega_n, z \rangle)$  are known because  
 119 the energy function is the sufficient statistics [2] of the Gibbs distribution. That enables subsequent  
 120 hidden layers to generate high-level features of input via directly processing the activations  $\{t_n\}_{n=1}^N$ ,  
 121 thus deep learning can form a hierarchical structure to represent much complex features.

122  $(\Omega_T, \mathcal{F}, P_T)$  answers a fundamental question: which component of a hidden layer contains the  
 123 information of the layer? Since  $\omega_n$  defines  $\Omega_T$ , the weights contain all the information of a layer. In  
 124 particular, since the activation  $t_n = \sigma(\langle \omega_n, z \rangle)$  is a function of  $\omega_n$ , the data processing inequality  
 125 [4] indicates that the information of  $t_n$  is no more than the information of  $\omega_n$ . Simulations in Section  
 126 4.2 demonstrate that if activations do not correctly characterize the cross-correlation between weights  
 127 and input, activations contain less information than weights do.

128 Based on  $(\Omega_T, \mathcal{F}, P_T)$ , we define the random variable  $T$  as follows:

129 **Definition 2.** Given the fully connected layer  $\mathbf{t}$ , we define the random variable  $T : \Omega_T \rightarrow E_T$  as

$$T(\omega_n) \triangleq n, \quad (6)$$

130 where the measurable space  $E_T = \{1, \dots, N\}$ .

131 Since  $\Omega_T$  is composed of finite  $N$  possible outcomes,  $T$  is a discrete random variable. Notably, the  
 132 one-to-one correspondence between  $\omega_n$  and  $n$  indicates

$$P_{T|Z}(\omega_n|z) = P_{T|Z}(n|z). \quad (7)$$

133 If not considering the back-propagation training, the weights (namely  $\Omega_{T_i}$ ) of each layer are fixed.  
 134 Thus  $T_{i+1}$  entirely depends on  $T_i$  and the MLP =  $\{\mathbf{x}; \mathbf{t}_1; \mathbf{t}_2; \hat{\mathbf{y}}\}$  forms a Markov chain

$$X \rightarrow T_1 \rightarrow T_2 \rightarrow \hat{Y}. \quad (8)$$

135 Based on the corresponding joint distribution  $P(\hat{Y}, T_2, T_1|X) = P(T_1|X)P(T_2|T_1)P(\hat{Y}|T_2)$  and  
 136 Definition 2, we derive a probabilistic explanation for the entire MLP, which is summarized in  
 137 Theorem 1. The detailed derivation is presented in Appendix B.

138 **Theorem 1.** The MLP =  $\{\mathbf{x}; \mathbf{t}_1; \mathbf{t}_2; \hat{\mathbf{y}}\}$  formulates a conditional Gibbs distribution

$$P_{\hat{Y}|X}(l|\mathbf{x}) = \sum_{k=1}^K \sum_{n=1}^N P(\hat{Y} = l, T_2 = k, T_1 = n|X = \mathbf{x}) = \frac{1}{Z_{\text{MLP}}(\mathbf{x})} \exp[g_l(\mathbf{t}_2(\mathbf{t}_1(\mathbf{x})))] \quad (9)$$

139 where  $Z_{\text{MLP}}(\mathbf{x}) = \sum_{l=1}^L \sum_{k=1}^K \sum_{n=1}^N P_{\hat{Y}, T_2, T_1|X}(l, k, n|x)$  is the partition function.

140 Since  $P_{\hat{Y}|X}(l|\mathbf{x})$  exactly equals the output  $\hat{y}_l$  of the MLP, namely Equation (4), we conclude that  
 141 the entire architecture of the MLP forms a family of Gibbs distribution  $P_{\hat{Y}|X}(l|\mathbf{x})$ . In general, the  
 142 back-propagation updates a weight  $\omega$  based on the gradient of  $\ell_{\text{CE}}$  with respect to  $\omega$ ,

$$\omega(s+1) = \omega(s) - \alpha \cdot \frac{\partial \ell_{\text{CE}}}{\partial \omega(s)} = \omega(s) - \alpha \cdot \frac{\partial \text{KL}[P(Y|X)||P(\hat{Y}|X)]}{\partial \omega(s)}, \quad (10)$$

143 where  $s$  is the index of training iteration,  $\alpha$  is the training rate, and  $\text{KL}[\cdot||\cdot]$  is the KL-divergence.

144 Figure 2 summarizes the probabilistic explanation for deep learning based on the MLP. In general,  
 145 a single learning iteration, an epoch, consists of two phases: training and inference (after training).  
 146 During inference, the MLP bridges  $X$  and  $\hat{Y}$  via multiple intermediate features  $\Omega_{T_1}$ ,  $\Omega_{T_2}$ , and  $\Omega_{\hat{Y}}$   
 147 defined by weights, and formulates the statistical relation between  $\hat{Y}$  and  $X$  as a family of conditional  
 148 Gibbs distribution  $P(\hat{Y}|X)$ . During training, the back-propagation updates weights to learn optimal  
 149 intermediate features for searching an optimal  $P(\hat{Y}|X)$  to accurately approximate  $P(Y|X)$ .

<sup>3</sup>Recent works about Gibbs explanations for a hidden layer are discussed in Appendix A.

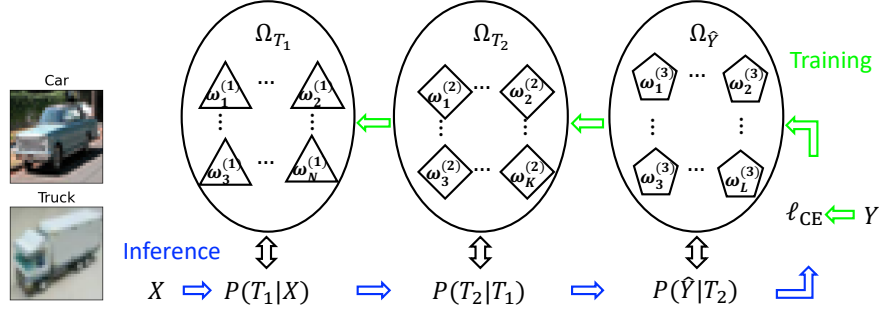

Figure 2: The visualization of the probabilistic explanation for deep learning based on the MLP.

### 150 3 The information theoretic explanations for deep learning

151 To address the limitations of existing IB explanations, this section proposes some novel information  
 152 theoretic explanations for DNNs based on the proposed probabilistic representation.

153 **Proposition 1.** The mutual information between a fully connected layer and dataset is finite.

$$I(X; T) < \infty. \quad (11)$$

154 *Proof:* Definition 2 shows  $E_T = \{1, \dots, N\}$ . Thus  $T$  is a discrete random variable and  $H(T) < \infty$ ,  
 155 thereby  $I(X; T) \leq H(T) < \infty$ .

156 Proposition 1 circumvents the infinite mutual information problem. In the absence of a clear definition  
 157  $T : \Omega_T \rightarrow E_T$ , most previous works [33, 3, 1] simply viewing the activation  $t_n$  as the sample of  $T$ ,  
 158 namely  $t_n \in E_T = \mathbb{R}$ , implies  $T$  being continuous and gives rise to the infinite mutual information  
 159 problem in deterministic DNNs. However,  $(\Omega_T, \mathcal{F}, P_T)$  indicates that  $t_n$  actually is a variable  
 160 measuring the cross-correlation between  $w_n$  and  $z$  rather than the sample of  $T$ , namely  $t_n \notin E_T$ .

161 **Theorem 2.** The information of  $Y$  flows into the MLP in the backward direction during training

$$T_1 \leftarrow T_2 \leftarrow \hat{Y} \leftarrow Y. \quad (12)$$

162 *Proof:* First, since  $\Omega_T$  is defined by  $\omega$  in  $(\Omega_T, \mathcal{F}, P_T)$  and Equation (10) shows that  $\omega(s+1)$  is  
 163 determined by all the previous gradients  $\{\frac{\partial \ell_{CE}}{\partial \omega^{(s)}}\}_{s=1}^S$ , and  $\omega(0)$  is randomly initialized and  $\alpha$  is a  
 164 constant, we can derive that  $\Omega_T$  is determined by  $\frac{\partial \ell_{CE}}{\partial \omega}$ . Second, based on the back-propagation, the  
 165 relation between gradients in two adjacent layers in the MLP  $= \{\mathbf{x}; \mathbf{t}_1; \mathbf{t}_2; \hat{\mathbf{y}}\}$  is formulated as

$$\begin{aligned} \frac{\partial \ell_{CE}^*}{\partial \omega_{kl}^{(3)}} &= [P_{\hat{Y}|X}(l|\mathbf{x}) - P_{Y|X}(l|\mathbf{x})] \cdot t_{2k}, \\ \frac{\partial \ell_{CE}^\circ}{\partial \omega_{nk}^{(2)}} &= \sum_{l=1}^L \frac{\partial \ell_{CE}^*}{\partial \omega_{kl}^{(3)}} \cdot \omega_{kl}^{(3)} \cdot \frac{\sigma_2'(\langle \omega_k^{(2)}, \mathbf{t}_1 \rangle)}{t_{2k}} \cdot t_{1n}, \quad \frac{\partial \ell_{CE}^\circ}{\partial \omega_{mn}^{(1)}} = \sum_{k=1}^K \frac{\partial \ell_{CE}^\circ}{\partial \omega_{nk}^{(2)}} \cdot \omega_{nk}^{(2)} \cdot \frac{\sigma_1'(\langle \omega_n^{(1)}, \mathbf{x} \rangle)}{t_{1n}} \cdot x_m. \end{aligned} \quad (13)$$

166 Equation 13 shows that  $\frac{\partial \ell_{CE}^*}{\partial \omega^{(3)}}$  is a function of  $P_{Y|X}(l|\mathbf{x})$  and  $\frac{\partial \ell_{CE}^\circ}{\partial \omega^{(i)}}$  is a function of  $\frac{\partial \ell_{CE}^*}{\partial \omega^{(i+1)}}$ , where  
 167  $\omega^{(3)}$  denotes the weight of  $\hat{\mathbf{y}}$ . The two points above enable us to derive that  $\Omega_{T_i}$  is a function of  $\Omega_{T_{i+1}}$   
 168 and  $\Omega_{\hat{Y}}$  is a function of  $P(Y|X)$ . Based on Definition 2, we can further derive that  $T_i$  is a function  
 169 of  $T_{i+1}$  and  $\hat{Y}$  is a function of  $Y$ , i.e.,  $T_1 \leftarrow T_2 \leftarrow \hat{Y} \leftarrow Y$ . (See the detailed proof in Appendix C).

170 Theorem 2 is consistent with the prevailing explanation for deep learning. LeCun *et al.* show that  
 171 deep learning exploits the hierarchical property of signals [21], i.e., the layers farther from output  
 172 learn lower-level features, such as edges, whereas the layers closer to output assemble lower-level  
 173 features into the higher-level features corresponding to labels (see Figure 2 in [43]). Notably, since  
 174 lower-level features commonly exist in signals with different labels (e.g., lower-level features, such  
 175 as the edges of the vehicle frame and the circular contour of wheels, exist in both the car and the  
 176 truck classes in the CIFAR-10 dataset [18] in Figure 2), lower-level features do not contain much  
 177 information of labels. Therefore, the layers farther from output do not have much information of  
 178 labels, which is consistent with the Markov chain  $T_1 \leftarrow T_2 \leftarrow \hat{Y} \leftarrow Y$ .

179 Since all the information of  $Y$  stems from  $X$  (i.e.,  $H(Y) = I(X; Y)$  proven in Appendix D),  
 180 Theorem 2 implies that partial information of  $X$  flows into the MLP in the backward direction during  
 181 training. Equation (2) shows the information of  $X$  flowing into the MLP in the forward direction  
 182 during inference. Overall, the information of  $X$  flows in the backward and forward directions during  
 183 training and inference, respectively. As a result, the Markov chain, Equation (2), proposed by recent  
 184 works could not fully characterize the information flow of  $X$  in the MLP in each epoch. In other  
 185 words,  $I(X; T_i)$  is not necessarily greater than  $I(X; T_{i+1})$  in the MLP in each epoch.

186 Equation (2) shows that  $T_i$  receives the information of  $Y$  via  $X$  during inference. Theorem 2 shows  
 187 that  $T_i$  also directly receives information of  $Y$  during training, because the back-propagation updates  
 188 weights (i.e.,  $\Omega_{T_i}$ ) based on the label  $Y$ . Thus Equation (2) cannot fully characterize the information  
 189 flow of  $Y$  in the MLP in each epoch, when we take into account the back-propagation training.

190 To fully characterize the information flow in the MLP in each epoch, we introduce Corollary 1.

191 **Corollary 1.** The information flow in the MLP can be characterized by two Markov chains as

$$\begin{aligned} \bar{X} &\rightarrow T_1 \rightarrow T_2 \rightarrow \hat{Y} \\ T_1 &\leftarrow T_2 \leftarrow \hat{Y} \leftarrow Y. \end{aligned} \tag{14}$$

192 The virtual random variable  $\bar{X}$  contains all the information of  $X$  except  $Y$ , i.e.,  $H(\bar{X}) = H(X|Y)$ .

193 *Proof of the first Markov chain:* Since  $\bar{X}$  does not have any information of  $Y$ , it can only flow into  
 194 the MLP in the forward direction during inference. Again since  $\bar{X}$  does not have any information of  
 195  $Y$ , the information flow of  $Y$  during training will not affect the information flow of  $\bar{X}$ . Therefore,  
 196  $\bar{X} \rightarrow T_1 \rightarrow T_2 \rightarrow \hat{Y}$  characterizes the information flow of  $\bar{X}$  in both training and inference phases.

197 *Proof of the second Markov chain:* Since the weights are fixed after training, the sample space and  
 198 the distribution of hidden layers are fixed after training. Therefore, the information of  $Y$  transferred  
 199 into hidden layers during training will retain there after training (i.e., during inference). In addition,  
 200 Definition 1 indicates that a fully connected layer  $\mathbf{t} = \{t_n = \sigma(\langle \omega_n, \mathbf{z} \rangle)\}_{n=1}^N$  measures the cross-  
 201 correlation between  $\omega_n$  and  $\mathbf{z}$  during inference, thus  $\{\omega_n\}_{n=1}^N$  can be viewed as a representation of  
 202  $Z$ . As a result, even though  $Z$  has all the information of  $Y$ , the information of  $Y$  that  $\mathbf{t}$  can learn  
 203 from  $Z$  is determined by how much information of  $Y$  the representation  $\{\omega_n\}_{n=1}^N$  has. Overall, the  
 204 information flow of  $Y$  during inference will be the same as that during training. Based on Theorem 2,  
 205 we conclude that  $T_1 \leftarrow T_2 \leftarrow \hat{Y} \leftarrow Y$  characterizes the information flow of  $Y$  in the MLP in both  
 206 training and inference phases. Detailed derivations and explanations are presented in Appendix E.

207 To quantify how much information of  $X$  and  $Y$  is learned by the MLP, we introduce Corollary 2.

208 **Corollary 2.** The mutual information between dataset and the entire MLP can be expressed as

$$\begin{aligned} I(X; T_{\text{MLP}}) &= I(\bar{X}; T_1) + I(Y; \hat{Y}) \\ I(Y; T_{\text{MLP}}) &= I(Y; \hat{Y}) \end{aligned} \tag{15}$$

209 where  $T_{\text{MLP}}$  denotes a random variable corresponding to the entire architecture of the MLP.

210 *Proof:* Since  $H(Y) = I(X; Y)$  (Appendix D),  $H(X) = H(\bar{X}) + I(X; Y) = H(\bar{X}) + H(Y)$ .  
 211 Hence, Corollary 2 can be derived by Corollary 1 and the chain rule. The proof is in Appendix F.

## 212 4 Simulations

213 In this section, we propose a mutual information estimator based on  $(\Omega_T, \mathcal{F}, P_T)$  and demonstrate the  
 214 probabilistic representation and information theoretic explanations for deep learning on a synthetic  
 215 dataset with known entropy. Additional experiments on benchmark datasets are in Appendix H.

### 216 4.1 Setup

217 **Mutual information estimator.** Based on the definition of mutual information, we have

$$I(X; T_i) = H(T_i) - H(T_i|X). \tag{16}$$

218 Previous works simply estimate  $I(X; T_i) = H(T_i)$ , because  $T_i$  is assumed to be entirely dependent  
 219 on  $X$  in the Markov chain, Equation (2), thereby  $H(T_i|X) = 0$ . However, Corollary 1 shows that  $T_i$   
 220 depends on both  $X$  and  $Y$  if taking into account the training phase, thereby  $H(T_i|X) \neq 0$ .

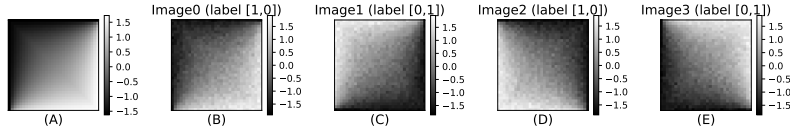

Figure 3: (A) the deterministic image  $\hat{\mathbf{x}}$ . Image0 is generated by adding  $\mathcal{N}(\mu, \sigma^2)$  without rotation, Image1 is generated by rotating  $\hat{\mathbf{x}}$  along the secondary diagonal direction and adding  $\mathcal{N}(\mu, \sigma^2)$ , Image2 and Image are generated by rotating  $\hat{\mathbf{x}}$  along the vertical and horizontal directions, respectively, and adding  $\mathcal{N}(\mu, \sigma^2)$ .

Table 1: The number of neurons(nodes) and the activation function in the layers of the MLPs

|      | $\mathbf{x}$            | $\mathbf{t}_1$ | $\mathbf{t}_2$ | $\hat{\mathbf{y}}$ | $\sigma(\cdot)$                                    |
|------|-------------------------|----------------|----------------|--------------------|----------------------------------------------------|
| MLP1 | 1024 ( $32 \times 32$ ) | 8              | 6              | 2                  | $\text{ReLU}(z) = \max(0, z)$                      |
| MLP2 | 1024 ( $32 \times 32$ ) | 8              | 6              | 2                  | $\text{Tanh}(z) = (e^z - e^{-z}) / (e^z + e^{-z})$ |
| MLP3 | 1024 ( $32 \times 32$ ) | 2              | 6              | 2                  | ReLU                                               |

221 To accurately estimate  $I(X; T_i)$ , we need to specify  $P(T_i|X)$  and  $P(T_i)$ . Based on  $(\Omega_{T_i}, \mathcal{F}, P_{T_i})$ ,  
 222 we formulate  $P_{T_i|X}(n|\mathbf{x}^j)$  of the three fully connected layers in the MLP as

$$\begin{aligned}
 P_{T_1|X}(n|\mathbf{x}^j) &= \frac{1}{Z_{F_1}} \exp[\sigma_1(\langle \boldsymbol{\omega}_n^{(1)}, \mathbf{x}^j \rangle)], \quad P_{T_2|X}(k|\mathbf{x}^j) = \frac{1}{Z_{F_2}} \exp[\sigma_2(\langle \boldsymbol{\omega}_k^{(2)}, \mathbf{t}_1(\mathbf{x}^j) \rangle)], \\
 P_{\hat{Y}|X}(l|\mathbf{x}^j) &= \frac{1}{Z_{F_Y}} \exp[\langle \boldsymbol{\omega}_l^{(3)}, \mathbf{t}_2(\mathbf{t}_1(\mathbf{x}^j)) \rangle].
 \end{aligned} \tag{17}$$

223 To derive the marginal distribution  $P(T_i)$ , we sum the joint distribution  $P(T_i, X)$  over  $\mathbf{x} \in \mathcal{X}$ ,

$$P(T_i = n) = \sum_{\mathbf{x} \in \mathcal{X}} P_X(\mathbf{x}) P_{T_i|X}(n|\mathbf{x}) \approx \sum_{\mathbf{x}^j \in \mathcal{D}} P_X(\mathbf{x}^j) P_{T_i|X}(n|\mathbf{x}^j) = \frac{1}{J} \sum_{\mathbf{x}^j \in \mathcal{D}} P_{T_i|X}(n|\mathbf{x}^j), \tag{18}$$

224 where  $P_X(\mathbf{x}^j)$  is estimated by the empirical distribution  $1/J$  given  $\mathcal{D}$ . Finally, we can derive  $I(X; T_i)$   
 225 by Equation 16, 17, and 18. Similarly, based on the definition of mutual information, we have

$$I(Y; T_i) = H(T_i) - H(T_i|Y). \tag{19}$$

226 To estimate  $H(T_i|Y)$ , we reformulate  $P(T_i|Y)$  as

$$P_{T_i|Y}(n|l) = \sum_{\mathbf{x} \in \mathcal{X}} P_{T_i|X}(n|\mathbf{x}) P_{X|Y}(\mathbf{x}|l) \approx \frac{1}{N(l)} \sum_{\mathbf{x}^j \in \mathcal{D}, y^j=l} P_{T_i|X}(n|\mathbf{x}^j), \tag{20}$$

227 where  $P_{X|Y}(\mathbf{x}^j|l)$  is estimated by the empirical distribution  $1/N(l)$  and  $N(l)$  denotes the number of  
 228 samples with the label  $l$  in  $\mathcal{D}$ . Finally, we can derive  $I(Y; T_i)$  by Equation 18, 19, and 20.

229 **Synthetic dataset.** The dataset consists of 512 gray-scale  $32 \times 32$  images, which are evenly generated  
 230 by rotating a deterministic image  $\hat{\mathbf{x}}$  in four different orientations and adding Gaussian noise with  
 231 expectation  $\mu = \mathbb{E}(\hat{\mathbf{x}})$  and variance  $\sigma^2 = 1$ , namely  $\mathbf{x} = r(\hat{\mathbf{x}}) + \mathcal{N}(\mu, \sigma^2)$ , where  $r(\cdot)$  denotes  
 232 the rotation method shown in Figure 3. The reason for adding Gaussian noise is to avoid DNNs  
 233 directly memorizing the deterministic image. In addition, the binary labels [1,0] and [0,1] evenly  
 234 divide the synthetic dataset into two classes. As a result, the synthetic dataset has (approximately)  
 235 2 bits information and the labels have 1 bit information. Compared to popular benchmark dataset  
 236 with unknown features and entropy, *e.g.*, MNIST [19] and Fashion-MNIST [41], the features and the  
 237 entropy of the synthetic dataset are clear and known, which enables us to examine the probabilistic  
 238 representation and the mutual information estimator.

239 **Neural Networks.** We train three MLPs, namely MLP1, MLP2 and MLP3, on the synthetic dataset  
 240 by a variant of Stochastic Gradient Descent (SGD) method, namely Adam [15], over 1000 epochs  
 241 with the learning rate  $\alpha = 0.03$ . Table 1 summarizes the architecture of the three MLPs.

## 242 4.2 Validating the probability space and the mutual information estimator

243 We demonstrate the sample space  $\Omega_T$  by visualizing the weights<sup>4</sup> of the eight neurons in  $\mathbf{t}_1$ , *i.e.*,  
 244  $\boldsymbol{\omega}_n^{(1)} = \{\omega_{mn}^{(1)}\}_{m=1}^{1024}$ , in 5 different epochs (*i.e.*, 0,1,4,128,1000) in Figure 4 (Left). As training  
 245 continues, we observe that  $\boldsymbol{\omega}_n^{(1)}$  quickly learns all the spatial features of the synthetic dataset. For  
 246 instance,  $\boldsymbol{\omega}_2^{(1)}$  has low magnitude at top-left positions and high magnitude at bottom-right positions,  
 247 which correctly characterizes the spatial feature of Image0. Similarly,  $\boldsymbol{\omega}_3^{(1)}$ ,  $\boldsymbol{\omega}_4^{(1)}$ , and  $\boldsymbol{\omega}_5^{(1)}$  correctly  
 248 characterize the spatial feature of Image1, Image2, and Image3 in Figure 3, respectively.

<sup>4</sup>We only show the learned weights in MLP1 because we observe that the learned weights in MLP1 and MLP2 are very similar, though they use different activation functions.

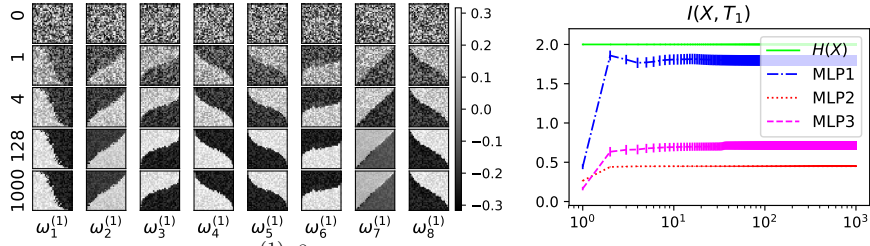

Figure 4: (Left) The eight features  $\{\omega_n^{(1)}\}_{n=1}^8$  learned by the weights of the eight neurons in 5 different epochs (*i.e.*, 0,1,4,128,1000), where  $\omega_n^{(1)} = \{\omega_{mn}^{(1)}\}_{m=1}^{1024}$  are reshaped into  $32 \times 32$  to show the spatial structure. (Right) The variation of  $I(X; T_1)$  in the MLP1, MLP2, and MLP3 during 1000 epochs.

Table 2: The Gibbs probability  $P_{F_1|X}(\omega_n^{(1)}|\text{Image0})$  in MLP1 and MLP2 in the 1000 epoch

|                                              | $\omega_1^{(1)}$ | $\omega_2^{(1)}$ | $\omega_3^{(1)}$ | $\omega_4^{(1)}$ | $\omega_5^{(1)}$ | $\omega_6^{(1)}$ | $\omega_7^{(1)}$ | $\omega_8^{(1)}$ |
|----------------------------------------------|------------------|------------------|------------------|------------------|------------------|------------------|------------------|------------------|
| $\langle \omega_n^{(1)}, \mathbf{x} \rangle$ | -63.6            | <b>208.8</b>     | -181.6           | 45.1             | -55.6            | 157.5            | -210.0           | -30.1            |
| $f_{1n}^{\text{ReLU}}(\mathbf{x})$           | 0.0              | <b>208.8</b>     | 0.0              | 45.1             | 0.0              | 157.5            | 0.0              | 0.0              |
| $\exp[f_{1n}^{\text{ReLU}}(\mathbf{x})]$     | 1.0              | <b>4.79e+90</b>  | 1.0              | 3.86e+19         | 1.0              | 2.51e+68         | 1.0              | 1.0              |
| $P_{T_1 X}^{\text{ReLU}}$                    | 0.0              | <b>1.0</b>       | 0.0              | 0.0              | 0.0              | 0.0              | 0.0              | 0.0              |
| $f_{1n}^{\text{Tanh}}(\mathbf{x})$           | -1.0             | <b>1.0</b>       | -1.0             | <b>1.0</b>       | -1.0             | <b>1.0</b>       | -1.0             | -1.0             |
| $\exp[f_{1n}^{\text{Tanh}}(\mathbf{x})]$     | 0.36             | <b>2.71</b>      | 0.36             | <b>2.71</b>      | 0.36             | <b>2.71</b>      | 0.36             | 0.36             |
| $P_{T_1 X}^{\text{Tanh}}$                    | 0.037            | <b>0.272</b>     | 0.037            | <b>0.272</b>     | 0.037            | <b>0.272</b>     | 0.037            | 0.037            |

$f_{1n}^{\text{Tanh}}(\mathbf{x}) = \sigma^{\text{Tanh}}(\langle \omega_n^{(1)}, \mathbf{x} \rangle)$  and  $f_{1n}^{\text{ReLU}}(\mathbf{x}) = \sigma^{\text{ReLU}}(\langle \omega_n^{(1)}, \mathbf{x} \rangle)$  are the activations given the same  $\langle \omega_n^{(1)}, \mathbf{x} \rangle$ .

249 We demonstrate that  $P(T_1|X)$  correctly measures the probability of  $\{\omega_n^{(1)}\}_{n=1}^8$  being recognized the  
 250 feature with the largest cross-correlation to  $\mathbf{x}$  in Table 2. For instance,  $\omega_2^{(1)}$  correctly characterizes  
 251 the feature of Image0 and has the largest cross-correlation  $\langle \omega_2^{(1)}, \mathbf{x} \rangle = 190.8$ , thus it has the largest  
 252 probability  $P_{T_1|X}^{\text{ReLU}}(\omega_2^{(1)}|\text{Image0}) = 1.0$  being recognized as the feature with largest cross-correlation  
 253 to Image0. In contrast, since  $\omega_7^{(1)}$  incorrectly characterizes the feature of Image0 and has the lowest  
 254 cross-correlation  $\langle \omega_7^{(1)}, \mathbf{x} \rangle = -210.0$ , so it has the lowest probability  $P_{T_1|X}^{\text{ReLU}}(\omega_7^{(1)}|\text{Image0}) = 0.0$   
 255 being recognized as the feature with largest cross-correlation to Image0.

256 We observe that an activation function (abbr. ACT) plays an important role in the distribution.  
 257 Specifically, ReLU, a non-saturating (unbounded) ACT [10], preserves the positive cross-correlations  
 258 while resets all the negative ones as zero.  $P_{T_1|X}^{\text{ReLU}}(\omega_2^{(1)}|\text{Image0}) = 1.0$  shows that ReLU derives the  
 259 correct probability of  $\omega_2^{(1)}$  being recognized as the feature with largest cross-correlation. In contrast,  
 260 though  $\omega_2^{(1)}$  has stronger cross-correlation to Image0 than  $\omega_4^{(1)}$ , *i.e.*,  $\langle \omega_2^{(1)}, \mathbf{x} \rangle > \langle \omega_4^{(1)}, \mathbf{x} \rangle$ , Tanh, a  
 261 saturating (bounded) ACT, derives  $f_{12}^{\text{Tanh}}(\mathbf{x}) = f_{14}^{\text{Tanh}}(\mathbf{x}) = 1.0$ , and makes  $\omega_4^{(1)}$  to incorrectly have  
 262 the same probability 0.272 to  $\omega_2^{(1)}$  being recognized as the feature with the largest cross-correlation  
 263 to Image0, *i.e.*, Tanh hinders  $t_1$  from correctly recognizing the features of input. The simulations for  
 264 validating the probability space based on other synthetic images are presented in Appendix G.

265 To validate the mutual information estimator, we follow recent works [35, 33] to train the three  
 266 MLPs with 50 different random initialization and study the average mutual information. Figure 4  
 267 (Right) shows that  $I(X; T_1)$  quickly increases to 1.81 and keeps stable in the MLP1, *i.e.*,  $t_1$  learns  
 268 most information of the dataset as  $H(X) = 2.0$ . Notably, the result is consistent with the variation  
 269 of the weights in Figure 4 (Left), which shows that the weights correctly characterize the features  
 270 of the dataset and keeps stable after the fourth epoch. As a comparison, we observe that  $I(X; T_1)$   
 271 keeps stable at 0.44 in the MLP2, which confirms the statement that Tanh hinders  $t_1$  from correctly  
 272 recognizing the features of input. In addition, Figure 4 (Right) shows that  $I(X; T_1) \approx 0.79$  in MLP3  
 273 is smaller than  $I(X; T_1) \approx 1.81$  in MLP1, which is consistent with Definition 1, *i.e.*, a layer with  
 274 fewer neurons would represent fewer possible features, thus it contains less information.

275 In summary, we demonstrate the probability space  $(\Omega_T, \mathcal{F}, P_T)$  and show that if an ACT cannot  
 276 preserve the cross-correlation between weights(features) and input, it would distort the distribution  
 277 of a layer, thereby affecting the mutual information between the layer and data/labels. In addition,  
 278 we show that the proposed mutual information estimator outperforms the existing non-parametric  
 279 models, *e.g.*, empirical distribution [35] and KDE [33], based on the synthetic dataset. Especially,  
 280 activations do not satisfy the *i.i.d.* prerequisite of non-parametric models is an important reason for  
 281 non-parametric models deriving inaccurate mutual information in DNNs. Due to limited space, the  
 282 experimental comparison and study of non-parametric models are presented in Appendix G.



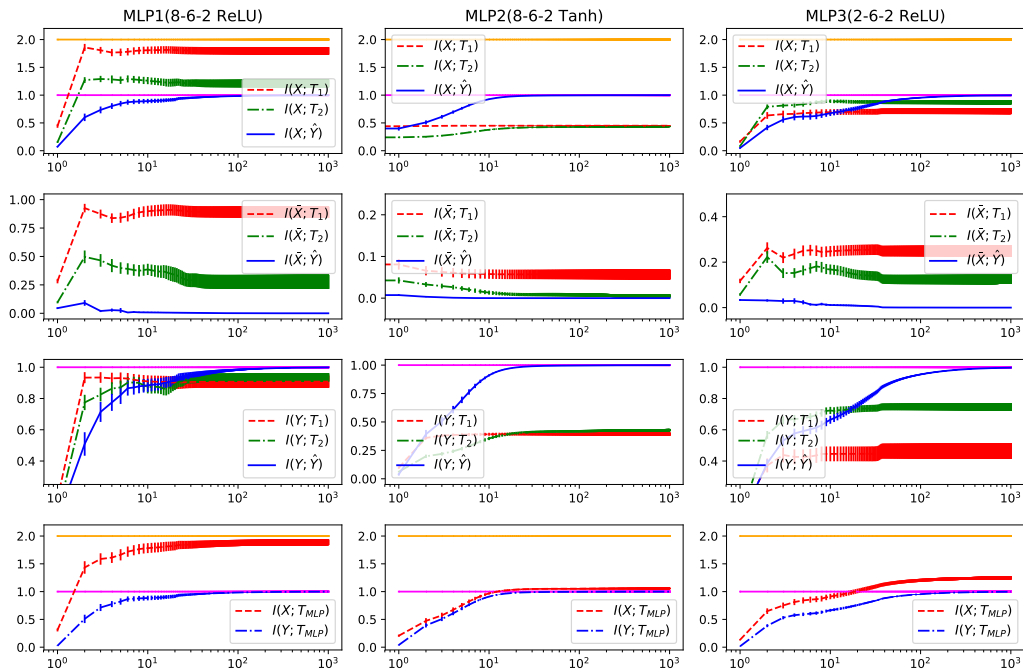

Figure 5: All the x-axis index training epochs. In each column, the first three figures show  $I(X; T_i)$ ,  $I(\bar{X}; T_i)$ , and  $I(Y; T_i)$  respectively. The fourth figure shows  $I(X; T_{MLP})$  and  $I(Y; T_{MLP})$  in a MLP. The pink line denotes  $H(Y) = 1.0$  and the orange line denotes  $H(X) = 2.0$ .

### 283 4.3 Validating the information theoretic explanations for DNNs

284 In Figure 5, we observe  $I(X; T_i) \leq I(X; \hat{Y})$  in MLP2 and MLP3, which confirms that the Markov  
 285 chain proposed by previous works, Equation (2), cannot fully explain the information flow in MLPs,  
 286 if taking into account the back-propagation training. As a comparison, the second and third row  
 287 show  $I(\bar{X}; T_1) \geq I(\bar{X}; T_2) \geq I(\bar{X}; \hat{Y})$  and  $I(Y; T_1) \leq I(Y; T_2) \geq I(Y; \hat{Y})$  in all the three MLPs,  
 288 which validates that Corollary 1, *i.e.*, Equation (14) characterizes the information flow in MLPs.

289 Figure 5 demonstrates that different hidden layers achieve different IB trade-offs depending on  
 290 the architecture and the position of the layers in MLPs. In terms of architecture,  $I(Y; T_1) > 0.8$   
 291 and  $I(\bar{X}; T_1) > 0.75$  in MLP1 indicate that  $t_1$ , with ReLU, achieves a good prediction without  
 292 much compression, whereas  $I(Y; T_1) < 0.5$  and  $I(\bar{X}; T_1) < 0.1$  in MLP2 show that  $t_1$ , with Tanh,  
 293 achieves a different IB trade-off. In addition,  $I(Y; T_1) \approx 0.45$  and  $I(\bar{X}; T_1) \approx 0.25$  in MLP3 show  
 294 the effect of neuron numbers on the IB trade-off. In terms of position,  $I(Y; \hat{Y}) = 1$  and  $I(\bar{X}; \hat{Y}) = 0$   
 295 in MLP1 means that  $\hat{y}$  has a different IB trade-off to  $t_1$  in MLP1.

296 We demonstrate that a MLP satisfies the IB principle no matter what the architecture of the MLP  
 297 is. Figure 5 visualizes  $I(X; T_{MLP})$  and  $I(Y; T_{MLP})$  based on Corollary 2. It shows that all of three  
 298 MLPs satisfy the IB principle, namely  $I(X; T_{MLP}) < H(X) = 2$  and  $I(Y; T_{MLP}) = H(Y) = 1$ ,  
 299 though they have different architectures. Importantly, in contrast to previous work [33] claiming that  
 300 the compression not exists in DNNs with non-saturating ACT, such as ReLU, Figure 5 clearly shows  
 301 that the compression exists in all the MLPs, no matter the activation function of MLPs.

302 We further demonstrate the information theoretic explanations for DNNs on the benchmark MNIST  
 303 and Fashion-MNIST datasets. The experiments are presented in Appendix H.

## 304 5 Conclusion and future work

305 In this work, we (1) specify the probability space for a hidden layer for (2) accurately estimating the  
 306 mutual information and (3) clearly explaining how the components of the layer affect the mutual  
 307 information. We take into account the back-propagation training and derive two novel Markov chains  
 308 to characterize the information flow in DNNs. Furthermore, we demonstrate that a DNN satisfies the  
 309 IB principle no matter the architecture of the DNN. In contrast, different hidden layers show different  
 310 IB trade-offs depending on the architecture and the position of the layers in DNNs. A potential  
 311 direction is to study the generalization of DNNs based on the probabilistic representation.

## References

- 312
- 313 [1] Rana Ali Amjad and Bernhard Claus Geiger. Learning representations for neural network-based classi-  
314 fication using the information bottleneck principle. *IEEE transactions on pattern analysis and machine*  
315 *intelligence*, 2019.
- 316 [2] George Casella and Roger L Berger. *Statistical inference*. Cengage Learning, 2021.
- 317 [3] Ivan Chelombiev, Conor Houghton, and Cian O’Donnell. Adaptive estimators show information compres-  
318 sion in deep neural networks. In *International Conference on Learning Representations*, 2019.
- 319 [4] Thomas Cover and Joy Thomas. *Elements of Information Theory*. Wiley-Interscience, Hoboken, New  
320 Jersey, 2006.
- 321 [5] Balázs Csanád Csáji et al. Approximation with artificial neural networks. *Faculty of Sciences, Eötvös Lornd*  
322 *University, Hungary*, 24(48):7, 2001.
- 323 [6] Rick Durrett. *Probability: theory and examples*, volume 49. Cambridge university press, 2019.
- 324 [7] Marylou Gabrié, Andre Manoel, Clément Luneau, Nicolas Macris, Florent Krzakala, Lenka Zdeborová,  
325 et al. Entropy and mutual information in models of deep neural networks. In *Advances in Neural*  
326 *Information Processing Systems*, pages 1821–1831, 2018.
- 327 [8] Matt W Gardner and SR Dorling. Artificial neural networks (the multilayer perceptron)—a review of  
328 applications in the atmospheric sciences. *Atmospheric environment*, 32(14-15):2627–2636, 1998.
- 329 [9] S. Geman and D. Geman. Stochastic relaxation, gibbs distributions, and the bayesian restoration of images.  
330 *IEEE Transactions. on Pattern Analysis and Machine Intelligence*, pages 721–741, June 1984.
- 331 [10] Xavier Glorot and Yoshua Bengio. Understanding the difficulty of training deep feedforward neural  
332 networks. In *Proceedings of the thirteenth international conference on artificial intelligence and statistics*,  
333 pages 249–256, 2010.
- 334 [11] Ziv Goldfeld, Ewout Van Den Berg, Kristjan Greenewald, Igor Melnyk, Nam Nguyen, Brian Kingsbury,  
335 and Yury Polyanskiy. Estimating information flow in deep neural networks. In *Proceedings of the 36th*  
336 *International Conference on Machine Learning*, volume 97, pages 2299–2308, 2019.
- 337 [12] Ian Goodfellow, Yoshua Bengio, Aaron Courville, and Yoshua Bengio. *Deep learning*, volume 1. MIT  
338 press Cambridge, 2016.
- 339 [13] Geoffrey E Hinton. Training products of experts by minimizing contrastive divergence. *Neural Computa-*  
340 *tion*, 14:1771–1800, 2002.
- 341 [14] Patrick Kidger and Terry Lyons. Universal approximation with deep narrow networks. In *Conference on*  
342 *Learning Theory*, pages 2306–2327. PMLR, 2020.
- 343 [15] Diederik P Kingma and Jimmy Ba. Adam: A method for stochastic optimization. *arXiv preprint*  
344 *arXiv:1412.6980*, 2014.
- 345 [16] Pang Wei Koh and Percy Liang. Understanding black-box predictions via influence functions. In  
346 *International Conference on Machine Learning*, pages 1885–1894. PMLR, 2017.
- 347 [17] Artemy Kolchinsky, Brendan D Tracey, and Steven Van Kuyk. Caveats for information bottleneck in  
348 deterministic scenarios. *arXiv preprint arXiv:1808.07593*, 2018.
- 349 [18] Alex Krizhevsky. Learning multiple layers of features from tiny images. *Technique Report*, 2009.
- 350 [19] Y. LeCun, BE. Boser, and JS. Denker. Handwritten digit recognition with a back-propagation network. In  
351 *NeurIPS*, pages 396–494, 1990.
- 352 [20] Y. LeCun, L. Bottou, and P. Haffner. Gradient-based learning applied to document recognition. *Proceedings*  
353 *of the IEEE*, 11:2278–2324, 1998.
- 354 [21] Yann LeCun, Yoshua Bengio, and Geoffrey Hinton. Deep learning. *nature*, 521(7553):436–444, 2015.
- 355 [22] Yann LeCun, Sumit Chopra, Raia Hadsell, Marc’Aurelio Ranzato, and Fu Jie Huang. *A tutorial on*  
356 *energy-based learning*. MIT Press, 2006.
- 357 [23] Jaehoon Lee, Yasaman Bahri, Roman Novak, Samuel S. Schoenholz, Jeffrey Pennington, and Jascha  
358 Sohl-Dickstein. Deep neural networks as gaussian processes. In *ICLR*, 2018.

- 359 [24] Henry W Lin, Max Tegmark, and David Rolnick. Why does deep and cheap learning work so well?  
360 *Journal of Statistical Physics*, 168(6):1223–1247, 2017.
- 361 [25] Aravindh Mahendran and Andrea Vedaldi. Understanding deep image representations by inverting them.  
362 In *Proceedings of the IEEE conference on computer vision and pattern recognition*, pages 5188–5196,  
363 2015.
- 364 [26] David McAllester and Karl Stratos. Formal limitations on the measurement of mutual information. In  
365 *International Conference on Artificial Intelligence and Statistics*, pages 875–884. PMLR, 2020.
- 366 [27] Pankaj Mehta and David J. Schwab. An exact mapping between the variational renormalization group and  
367 deep learning. *arXiv preprint arXiv:1410.3831*, 2014.
- 368 [28] Julian D Olden and Donald A Jackson. Illuminating the “black box”: a randomization approach for  
369 understanding variable contributions in artificial neural networks. *Ecological modelling*, 154(1-2):135–150,  
370 2002.
- 371 [29] Liam Paninski. Estimation of entropy and mutual information. *Neural computation*, 15(6):1191–1253,  
372 2003.
- 373 [30] David E. Rumelhart, Geoffrey E. Hinton, and Ronald J. Williams. Learning representations by back-  
374 propagating errors. *Nature*, 323:533–536, October 1986.
- 375 [31] Ruslan Salakhutdinov and Geoffrey Hinton. Deep boltzmann machines. In *Artificial intelligence and  
376 statistics*, pages 448–455. PMLR, 2009.
- 377 [32] Wojciech Samek, Thomas Wiegand, and Klaus-Robert Müller. Explainable artificial intelligence: Under-  
378 standing, visualizing and interpreting deep learning models. *arXiv preprint arXiv:1708.08296*, 2017.
- 379 [33] Andrew Saxe, Yamini Bansal, Joel Dapello, Madhu Advani, Artemy Kolchinsky, Brendan Tracey, and  
380 David Cox. On the information bottleneck theory of deep learning. In *International Conference on  
381 Representation Learning*, 2018.
- 382 [34] Ohad Shamir, Sivan Sabato, and Naftali Tishby. Learning and generalization with the information  
383 bottleneck. *Theoretical Computer Science*, 411(29-30):2696–2711, 2010.
- 384 [35] Ravid Shwartz-Ziv and Naftali Tishby. Opening the black box of deep neural networks via information.  
385 *arXiv preprint arXiv:1703.00810*, 2017.
- 386 [36] Noam Slonim. *The information bottleneck: Theory and applications*. PhD thesis, Citeseer, 2002.
- 387 [37] Naftali Tishby, Fernando C Pereira, and William Bialek. The information bottleneck method. *arXiv  
388 preprint physics/0004057*, 2000.
- 389 [38] Naftali Tishby and Noga Zaslavsky. Deep learning and the information bottleneck principle. In *2015 IEEE  
390 Information Theory Workshop (ITW)*, pages 1–5. IEEE, 2015.
- 391 [39] Vladimir N Vapnik. An overview of statistical learning theory. *IEEE transactions on neural networks*,  
392 10(5):988–999, 1999.
- 393 [40] Larry Wasserman. *All of nonparametric statistics*. Springer Science & Business Media, 2006.
- 394 [41] Han Xiao, Kashif Rasul, and Roland Vollgraf. Fashion-mnist: a novel image dataset for benchmarking  
395 machine learning algorithms. *arXiv preprint arXiv:1708.07747*, 2017.
- 396 [42] Sho Yaida. Non-gaussian processes and neural networks at finite widths. *arXiv preprint arXiv:1910.00019*,  
397 2019.
- 398 [43] Matthew D Zeiler and Rob Fergus. Visualizing and understanding convolutional networks. In *European  
399 conference on computer vision*, pages 818–833. Springer, 2014.
- 400 [44] Chiyuan Zhang, Samy Bengio, Moritz Hardt, Benjamin Recht, and Oriol Vinyals. Understanding deep  
401 learning requires rethinking generalization. *arXiv preprint arXiv:1611.03530*, 2016.

402 **Checklist**

- 403 1. For all authors...
- 404 (a) Do the main claims made in the abstract and introduction accurately reflect the paper’s contribu-  
405 tions and scope? [Yes]
- 406 (b) Did you describe the limitations of your work? [Yes] see Section 5
- 407 (c) Did you discuss any potential negative societal impacts of your work? [N/A]
- 408 (d) Have you read the ethics review guidelines and ensured that your paper conforms to them? [Yes]
- 409 2. If you are including theoretical results...
- 410 (a) Did you state the full set of assumptions of all theoretical results? [Yes]
- 411 (b) Did you include complete proofs of all theoretical results? [Yes]
- 412 3. If you ran experiments...
- 413 (a) Did you include the code, data, and instructions needed to reproduce the main experimental  
414 results (either in the supplemental material or as a URL)? [Yes] see the URL in Appendix G
- 415 (b) Did you specify all the training details (e.g., data splits, hyperparameters, how they were chosen)?  
416 [Yes] see Section 4.1, Appendix G, and Appendix H
- 417 (c) Did you report error bars (e.g., with respect to the random seed after running experiments  
418 multiple times)? [Yes] see Section 4
- 419 (d) Did you include the total amount of compute and the type of resources used (e.g., type of GPUs,  
420 internal cluster, or cloud provider)? [Yes] see Appendix G
- 421 4. If you are using existing assets (e.g., code, data, models) or curating/releasing new assets...
- 422 (a) If your work uses existing assets, did you cite the creators? [Yes]
- 423 (b) Did you mention the license of the assets? [Yes]
- 424 (c) Did you include any new assets either in the supplemental material or as a URL? [Yes] see  
425 Appendix H
- 426 (d) Did you discuss whether and how consent was obtained from people whose data you’re us-  
427 ing/curating? [N/A]
- 428 (e) Did you discuss whether the data you are using/curating contains personally identifiable informa-  
429 tion or offensive content? [N/A]
- 430 5. If you used crowdsourcing or conducted research with human subjects...
- 431 (a) Did you include the full text of instructions given to participants and screenshots, if applicable?  
432 [N/A]
- 433 (b) Did you describe any potential participant risks, with links to Institutional Review Board (IRB)  
434 approvals, if applicable? [N/A]
- 435 (c) Did you include the estimated hourly wage paid to participants and the total amount spent on  
436 participant compensation? [N/A]

## 437 A Recent works about Gibbs explanations for a hidden layer

438 As a fundamental probabilistic graphic model, the Gibbs distribution (a.k.a., Boltzmann distribution, the energy  
439 based model, or the renormalization group) formulates the dependence within  $X$  by associating an energy  
440  $E(\mathbf{x}; \boldsymbol{\theta})$  to each dependence structure [9].

$$P(X; \boldsymbol{\theta}, \beta) = \frac{1}{Z(\boldsymbol{\theta}, \beta)} \exp[-\beta E(\mathbf{x}; \boldsymbol{\theta})], \quad (21)$$

441 where  $E(\mathbf{x}; \boldsymbol{\theta})$  is the energy function,  $\boldsymbol{\theta}$  denote the parameters of  $E(\mathbf{x}; \boldsymbol{\theta})$ ,  $\beta$  is the inverse temperature constant.  
442 Since  $\beta$  can be absorbed into  $\boldsymbol{\theta}$ ,  $P(X; \boldsymbol{\theta}, \beta)$  can be simplified as

$$P(X; \boldsymbol{\theta}) = \frac{1}{Z(\boldsymbol{\theta})} \exp[-E(\mathbf{x}; \boldsymbol{\theta})], \quad (22)$$

443 where the partition function<sup>5</sup> is defined as

$$Z(\boldsymbol{\theta}) = \sum_{\mathbf{x} \in \mathcal{X}} \exp[-E(\mathbf{x}; \boldsymbol{\theta})]. \quad (23)$$

444 The Gibbs distribution has three appealing properties. First, the deterministic energy function  $E(\mathbf{x}; \boldsymbol{\theta})$  is a  
445 sufficient statistics of  $P(X; \boldsymbol{\theta})$ . The property allows us to explain a deterministic function, e.g., a hidden layer,  
446 in a probabilistic way. Second, a Gibbs distribution can be easily reformulated as various probabilistic models  
447 via redefining  $E(\mathbf{x}; \boldsymbol{\theta})$ , which allows us to clarify the complicated architecture of a hidden layer. For example,  
448 if the energy function is defined as the summation of multiple functions, namely  $E(\mathbf{x}; \boldsymbol{\theta}) = -\sum_k f_k(\mathbf{x}; \boldsymbol{\theta}_k)$ ,  
449 the Gibbs distribution would be the Product of Experts (PoE) model, *i.e.*,  $P(\mathbf{x}; \boldsymbol{\theta}) = \frac{1}{Z(\boldsymbol{\theta})} \prod_k F_k$ , where  
450  $F_k = \exp[-f_k(\mathbf{x}; \boldsymbol{\theta}_k)]$  and  $Z(\boldsymbol{\theta}) = \prod_k Z(\boldsymbol{\theta}_k)$  [13]. Third, the energy minimization is a typical optimization  
451 for  $\boldsymbol{\theta}$ , namely  $\boldsymbol{\theta}^* = \arg \min_{\boldsymbol{\theta}} E(\mathbf{x}; \boldsymbol{\theta})$  [22], which allows us to explain the back-propagation training, as the  
452 energy minimization can be implemented by the gradient descent algorithm as long as  $E(\mathbf{x}; \boldsymbol{\theta})$  is differentiable.

453 A well-known Gibbs distribution model in machine learning is the Restricted Boltzmann Machines (RBMs)  
454 [31, 27]. Though Yaida indirectly proves the distribution of a fully connected layer as a Gibbs distribution [42],  
455 and Lin *et al.* clarify certain advantages of DNNs based on the Gibbs distribution [24], there is few work to  
456 extend the Gibbs explanation to complicated hidden layers, e.g., fully connected layers and convolutional layers.

## 457 B The marginal distribution of the MLP

458 Since the entire architecture of the MLP =  $\{\mathbf{x}, \mathbf{t}_1, \mathbf{t}_2, \hat{\mathbf{y}}\}$  corresponds to a joint distribution

$$P(\hat{Y}, T_2, T_1 | X) = P(\hat{Y} | T_2) P(T_2 | T_1) P(T_1 | X), \quad (24)$$

459 the marginal distribution  $P(\hat{Y} | X)$  can be formulated as

$$\begin{aligned} P_{\hat{Y}|X}(l|\mathbf{x}) &= \sum_{k=1}^K \sum_{n=1}^N P(\hat{Y} = l, T_2 = k, T_1 = n | X = \mathbf{x}) \\ &= \sum_{k=1}^K \sum_{n=1}^N P_{\hat{Y}|T_2}(l|k) P_{T_2|T_1}(k|n) P_{T_1|X}(n|\mathbf{x}). \end{aligned} \quad (25)$$

460 Based on the definition of the Gibbs probability measure (Equation 5), we have

$$P_{T_1|X}(n|\mathbf{x}) = \frac{1}{Z_{T_1}} \exp(t_{1n}) = \frac{1}{Z_{T_1}} \exp[\sigma_1(\langle \boldsymbol{\omega}_n^{(1)}, \mathbf{x} \rangle)], \quad (26)$$

461 where  $\langle \boldsymbol{\omega}_n^{(1)}, \mathbf{x} \rangle = \sum_{m=1}^M \omega_{mn}^{(1)} \cdot x_m + b_{1n}$ . Similarly, we have

$$P_{T_2|T_1}(k|n) = \frac{1}{Z_{T_2}} \exp(t_{2k}) = \frac{1}{Z_{T_2}} \exp[\sigma_2(\langle \boldsymbol{\omega}_k^{(2)}, \mathbf{t}_1 \rangle)], \quad (27)$$

462 where  $\langle \boldsymbol{\omega}_k^{(2)}, \mathbf{t}_1 \rangle = \sum_{n=1}^N \omega_{nk}^{(2)} \cdot t_{1n} + b_{2k}$ . Thus we have

$$\begin{aligned} &\sum_{n=1}^N P_{T_2|T_1}(k|n) P_{T_1|X}(n|\mathbf{x}) \\ &= \frac{1}{Z_{T_2}} \frac{1}{Z_{T_1}} \sum_{n=1}^N \exp[\sigma_2(\langle \boldsymbol{\omega}_k^{(2)}, \mathbf{t}_1 \rangle)] \exp[\sigma_1(\langle \boldsymbol{\omega}_n^{(1)}, \mathbf{x} \rangle)]. \end{aligned} \quad (28)$$

<sup>5</sup>We only consider the discrete case in the paper.

463 Since  $\langle \boldsymbol{\omega}_k^{(2)}, \mathbf{t}_1 \rangle = \sum_{n=1}^N \boldsymbol{\omega}_{nk}^{(2)} \cdot \mathbf{t}_{1n} + b_{2k}$  is a constant with respect to  $n$ , we have

$$\begin{aligned} & \sum_{n=1}^N P_{T_2|T_1}(k|n) P_{T_1|X}(n|\mathbf{x}) \\ &= \frac{1}{Z_{T_2}} \frac{1}{Z_{T_1}} \exp[\sigma_2(\langle \boldsymbol{\omega}_k^{(2)}, \mathbf{t}_1 \rangle)] \sum_{n=1}^N \exp[\sigma_1(\langle \boldsymbol{\omega}_n^{(1)}, \mathbf{x} \rangle)]. \end{aligned} \quad (29)$$

464 In addition,  $\sum_{n=1}^N \exp[\sigma_1(\langle \boldsymbol{\omega}_n^{(1)}, \mathbf{x} \rangle)] = Z_{T_1}$ , thus we have

$$\sum_{n=1}^N P_{T_2|T_1}(k|n) P_{T_1|X}(n|\mathbf{x}) = \frac{1}{Z_{T_2}} \exp[\sigma_2(\langle \boldsymbol{\omega}_k^{(2)}, \mathbf{t}_1 \rangle)]. \quad (30)$$

465 Therefore, we can simplify  $P_{\hat{Y}|X}(l|\mathbf{x})$  as

$$\begin{aligned} P_{\hat{Y}|X}(l|\mathbf{x}) &= \sum_{k=1}^K P_{\hat{Y}|T_2}(l|k) \sum_{n=1}^N P_{T_2|T_1}(k|n) P_{T_1|X}(n|\mathbf{x}) \\ &= \sum_{k=1}^K P_{\hat{Y}|T_2}(l|k) \frac{1}{Z_{T_2}} \exp[\sigma_2(\langle \boldsymbol{\omega}_k^{(2)}, \mathbf{t}_1 \rangle)]. \end{aligned} \quad (31)$$

466 Since  $P_{\hat{Y}|T_2}(l|k) = \frac{1}{Z_{\hat{Y}}} \exp[\sigma_3(\langle \boldsymbol{\omega}_l^{(3)}, \mathbf{t}_2 \rangle)]$  and  $\langle \boldsymbol{\omega}_l^{(3)}, \mathbf{t}_2 \rangle = \sum_{k=1}^K \boldsymbol{\omega}_{lk}^{(3)} f_{2k} + b_{yl}$  is a constant with respect  
467 to  $k$ , we can derive

$$P_{\hat{Y}|X}(l|\mathbf{x}) = P_{\hat{Y}|T_2}(l|k) \sum_{k=1}^K \frac{1}{Z_{T_2}} \exp[\sigma_2(\langle \boldsymbol{\omega}_k^{(2)}, \mathbf{t}_1 \rangle)]. \quad (32)$$

468 Since  $Z_{T_2} = \sum_{k=1}^K \exp[\sigma_2(\langle \boldsymbol{\omega}_k^{(2)}, \mathbf{t}_1 \rangle)]$  is also constant to  $k$ ,

$$\begin{aligned} P_{\hat{Y}|X}(l|\mathbf{x}) &= P_{\hat{Y}|T_2}(l|k) \frac{1}{Z_{T_2}} \sum_{k=1}^K \exp[\sigma_2(\langle \boldsymbol{\omega}_k^{(2)}, \mathbf{t}_1 \rangle)]. \\ &= P_{\hat{Y}|T_2}(l|k) = \frac{1}{Z_{F_Y}} \exp[\langle \boldsymbol{\omega}_l^{(3)}, \mathbf{t}_2 \rangle]. \end{aligned} \quad (33)$$

469 In addition, since  $\mathbf{t}_2 = \{t_{2k}\}_{k=1}^K = \{\sigma_2(\langle \boldsymbol{\omega}_k^{(2)}, \mathbf{t}_1 \rangle)\}_{k=1}^K$ , we can extend  $P_{\hat{Y}|X}(l|\mathbf{x})$  as

$$\begin{aligned} P_{\hat{Y}|X}(l|\mathbf{x}) &= P_{\hat{Y}|F_2}(l|k) = \frac{1}{Z_{F_Y}} \exp[\langle \boldsymbol{\omega}_l^{(3)}, \mathbf{t}_2 \rangle] \\ &= \frac{1}{Z_{\hat{Y}}} \exp[\langle \boldsymbol{\omega}_l^{(3)}, \begin{pmatrix} \sigma_2(\langle \boldsymbol{\omega}_1^{(2)}, \mathbf{t}_1 \rangle) \\ \vdots \\ \sigma_2(\langle \boldsymbol{\omega}_K^{(2)}, \mathbf{t}_1 \rangle) \end{pmatrix} \rangle]. \end{aligned} \quad (34)$$

470 Since  $\mathbf{t}_1 = \{t_{1n}\}_{n=1}^N = \{\sigma_1(\langle \boldsymbol{\omega}_n^{(1)}, \mathbf{x} \rangle)\}_{n=1}^N$ , we can further extend  $P_{\hat{Y}|X}(l|\mathbf{x})$  as

$$\begin{aligned} P_{\hat{Y}|X}(l|\mathbf{x}) &= \frac{1}{Z_{\hat{Y}}} \exp[\langle \boldsymbol{\omega}_l^{(3)}, \begin{pmatrix} \sigma_2(\langle \boldsymbol{\omega}_1^{(2)}, \begin{pmatrix} \sigma_1(\langle \boldsymbol{\omega}_1^{(1)}, \mathbf{x} \rangle) \\ \vdots \\ \sigma_1(\langle \boldsymbol{\omega}_N^{(1)}, \mathbf{x} \rangle) \end{pmatrix} \rangle) \\ \vdots \\ \sigma_2(\langle \boldsymbol{\omega}_K^{(2)}, \begin{pmatrix} \sigma_1(\langle \boldsymbol{\omega}_1^{(1)}, \mathbf{x} \rangle) \\ \vdots \\ \sigma_1(\langle \boldsymbol{\omega}_N^{(1)}, \mathbf{x} \rangle) \end{pmatrix} \rangle) \end{pmatrix} \rangle] \\ &= \frac{1}{Z_{\text{MLP}}(\mathbf{x})} \exp[g_l(\mathbf{t}_2(\mathbf{t}_1(\mathbf{x})))]. \end{aligned} \quad (35)$$

471 Overall, we prove  $P_{\hat{Y}|X}(l|\mathbf{x})$  as the Gibbs distribution expressed as

$$P_{\hat{Y}|X}(l|\mathbf{x}) = \frac{1}{Z_{\text{MLP}}(\mathbf{x})} \exp[g_l(\mathbf{t}_2(\mathbf{t}_1(\mathbf{x})))]. \quad (36)$$

472 where  $E_l(\mathbf{x}) = -g_l(\mathbf{t}_2(\mathbf{t}_1(\mathbf{x})))$  is the energy function and the partition function

$$\begin{aligned} Z_{\text{MLP}}(\mathbf{x}) &= \sum_{l=1}^L \sum_{k=1}^K \sum_{t=1}^T P(\hat{Y}, T_2, T_1 | X = \mathbf{x}) \\ &= \sum_{l=1}^L \exp[g_l(\mathbf{t}_2(\mathbf{t}_1(\mathbf{x})))]. \end{aligned} \quad (37)$$

## 473 C The proof of Theorem 2

474 Based on the definition of the cross entropy,  $\ell_{\text{CE}}$  can be formulated as

$$\ell_{\text{CE}} = - \sum_{l=1}^L P_{Y|X}(l|\mathbf{x}) \log P_{\hat{Y}|X}(l|\mathbf{x}). \quad (38)$$

475 where  $P_{\hat{Y}|X}(l|\mathbf{x})$  is the output of the MLP, and  $P_{Y|X}(l|\mathbf{x})$  is the one-hot probability of  $\mathbf{x}$  given the label  $y$ , i.e.,

$$P_{Y|X}(l|\mathbf{x}) = \begin{cases} 1 & \text{for } l = y \\ 0 & \text{for } l \neq y \end{cases} \quad (39)$$

476 The derivative of  $\ell_{\text{CE}}$  with respect to  $P_{\hat{Y}|X}(l|\mathbf{x})$  is

$$\frac{\partial \ell_{\text{CE}}}{\partial P_{\hat{Y}|X}(l|\mathbf{x})} = - \frac{P_{Y|X}(l|\mathbf{x})}{P_{\hat{Y}|X}(l|\mathbf{x})}. \quad (40)$$

477 Since  $P_{\hat{Y}|X}(l|\mathbf{x})$  can be expressed as

$$P_{\hat{Y}|X}(l|\mathbf{x}) = \frac{1}{Z_{\text{MLP}}(\mathbf{x})} \exp[g_l(\mathbf{t}_2 \mathbf{t}_1(\mathbf{x}))], \quad (41)$$

478 the derivative of  $P_{\hat{Y}|X}(z|\mathbf{x})$  with respect to  $g_l(\mathbf{t}_2 \mathbf{t}_1(\mathbf{x}))$  is

$$\frac{\partial P_{\hat{Y}|X}(z|\mathbf{x})}{\partial g_l} = \frac{\frac{1}{Z_{\text{MLP}}} \exp(g_z)}{\frac{\partial g_l}{\partial g_l}} = \begin{cases} P_{\hat{Y}|X}(l|\mathbf{x}) \cdot [1 - P_{\hat{Y}|X}(l|\mathbf{x})] & \text{for } z = l \\ -P_{\hat{Y}|X}(l|\mathbf{x}) \cdot P_{\hat{Y}|X}(z|\mathbf{x}) & \text{for } z \neq l \end{cases}. \quad (42)$$

479 Overall, the derivative of  $\ell_{\text{CE}}$  with respect to  $g_l$  can be expressed as

$$\begin{aligned} \frac{\partial \ell_{\text{CE}}}{\partial g_l} &= \sum_{z=1}^L \frac{\partial \ell_{\text{CE}}}{\partial P_{\hat{Y}|X}(z|\mathbf{x})} \frac{\partial P_{\hat{Y}|X}(z|\mathbf{x})}{\partial g_l} \\ &= -P_{Y|X}(l|\mathbf{x}) (1 - P_{\hat{Y}|X}(l|\mathbf{x})) + \sum_{z \neq l} P_{Y|X}(z|\mathbf{x}) P_{\hat{Y}|X}(l|\mathbf{x}) \\ &= P_{\hat{Y}|X}(l|\mathbf{x}) - P_{Y|X}(l|\mathbf{x}). \end{aligned} \quad (43)$$

480 Since  $g_l = \langle \boldsymbol{\omega}_l^{(3)}, \mathbf{t}_2 \rangle = \sum_{k=1}^K \omega_{kl}^{(3)} \cdot t_{2k} + b_{yl}$ , the derivative of  $\ell_{\text{CE}}$  with respect to  $\omega_{kl}^{(3)}$  can be expressed as

$$\frac{\partial \ell_{\text{CE}}}{\partial \omega_{kl}^{(3)}} = \frac{\partial \ell_{\text{CE}}}{\partial g_l} \frac{\partial g_l}{\partial \omega_{kl}^{(3)}} = [P_{\hat{Y}|X}(l|\mathbf{x}) - P_{Y|X}(l|\mathbf{x})] t_{2k}. \quad (44)$$

481 Similarly, the derivative of  $\ell_{\text{CE}}$  with respect to  $\langle \boldsymbol{\omega}_k^{(2)}, \mathbf{t}_1 \rangle$  can be expressed as

$$\begin{aligned} \frac{\partial \ell_{\text{CE}}}{\partial \langle \boldsymbol{\omega}_k^{(2)}, \mathbf{t}_1 \rangle} &= \sum_{l=1}^L \frac{\partial \ell_{\text{CE}}}{\partial g_l} \frac{\partial g_l}{\partial t_{2k}} \frac{\partial t_{2k}}{\partial \langle \boldsymbol{\omega}_k^{(2)}, \mathbf{t}_1 \rangle} \\ &= \sum_{l=1}^L [P_{\hat{Y}|X}(l|\mathbf{x}) - P_{Y|X}(l|\mathbf{x})] \omega_{kl}^{(3)} \sigma_2'(\langle \boldsymbol{\omega}_k^{(2)}, \mathbf{t}_1 \rangle). \end{aligned} \quad (45)$$

482 Since  $\langle \boldsymbol{\omega}_k^{(2)}, \mathbf{t}_1 \rangle = \sum_{n=1}^N \omega_{nk}^{(2)} \cdot t_{1n} + b_{2k}$ , the derivative of  $\ell$  with respect to  $\omega_{nk}^{(2)}$  can be expressed as

$$\begin{aligned} \frac{\partial \ell_{\text{CE}}}{\partial \omega_{nk}^{(2)}} &= \frac{\partial \ell_{\text{CE}}}{\partial \langle \boldsymbol{\omega}_k^{(2)}, \mathbf{t}_1 \rangle} \frac{\partial \langle \boldsymbol{\omega}_k^{(2)}, \mathbf{t}_1 \rangle}{\partial \omega_{nk}^{(2)}} \\ &= \sum_{l=1}^L [P_{\hat{Y}|X}(l|\mathbf{x}) - P_{Y|X}(l|\mathbf{x})] \omega_{kl}^{(3)} \sigma_2'(\langle \boldsymbol{\omega}_k^{(2)}, \mathbf{t}_1 \rangle) t_{1n} \end{aligned} \quad (46)$$

483 Similarly, the derivative of  $\ell_{\text{CE}}$  with respect to  $\langle \boldsymbol{\omega}_n^{(1)}, \boldsymbol{x} \rangle$  can be expressed as

$$\begin{aligned} \frac{\partial \ell_{\text{CE}}}{\partial \langle \boldsymbol{\omega}_n^{(1)}, \boldsymbol{x} \rangle} &= \sum_{k=1}^K \frac{\partial \ell_{\text{CE}}}{\partial \langle \boldsymbol{\omega}_k^{(2)}, \boldsymbol{t}_1 \rangle} \frac{\partial \langle \boldsymbol{\omega}_k^{(2)}, \boldsymbol{t}_1 \rangle}{\partial t_{1n}} \frac{\partial t_{1n}}{\partial \langle \boldsymbol{\omega}_n^{(1)}, \boldsymbol{x} \rangle} \\ &= \sum_{k=1}^K \sum_{l=1}^L [P_{\hat{Y}|X}(l|\boldsymbol{x}) - P_{Y|X}(l|\boldsymbol{x})] \omega_{kl}^{(3)} \sigma_2'(\langle \boldsymbol{\omega}_k^{(2)}, \boldsymbol{t}_1 \rangle) \omega_{nk}^{(2)} \sigma_1'(\langle \boldsymbol{\omega}_n^{(1)}, \boldsymbol{x} \rangle). \end{aligned} \quad (47)$$

484 Since  $\langle \boldsymbol{\omega}_n^{(1)}, \boldsymbol{x} \rangle = \sum_{m=1}^M \omega_{mn}^{(1)} \cdot x_m + b_{1n}$ , the derivative of  $\ell_{\text{CE}}$  with respect to  $\omega_{mn}^{(1)}$  can be expressed as

$$\begin{aligned} \frac{\partial \ell_{\text{CE}}}{\partial \omega_{mn}^{(1)}} &= \frac{\partial \ell_{\text{CE}}}{\partial \langle \boldsymbol{\omega}_n^{(1)}, \boldsymbol{x} \rangle} \frac{\partial \langle \boldsymbol{\omega}_n^{(1)}, \boldsymbol{x} \rangle}{\partial \omega_{mn}^{(1)}} \\ &= \sum_{k=1}^K \sum_{l=1}^L [P_{\hat{Y}|X}(l|\boldsymbol{x}) - P_{Y|X}(l|\boldsymbol{x})] \omega_{kl}^{(3)} \sigma_2'(\langle \boldsymbol{\omega}_k^{(2)}, \boldsymbol{t}_1 \rangle) \omega_{nk}^{(2)} \sigma_1'(\langle \boldsymbol{\omega}_n^{(1)}, \boldsymbol{x} \rangle) x_m. \end{aligned} \quad (48)$$

485 Overall, the derivative of  $\ell_{\text{CE}}$  with respect to the weight in each layer is summarized as

$$\begin{aligned} \frac{\partial \ell_{\text{CE}}}{\partial \omega_{kl}^{(3)}} &= [P_{\hat{Y}|X}(l|\boldsymbol{x}) - P_{Y|X}(l|\boldsymbol{x})] t_{2k} \\ \frac{\partial \ell_{\text{CE}}}{\partial \omega_{nk}^{(2)}} &= \sum_{l=1}^L [P_{\hat{Y}|X}(l|\boldsymbol{x}) - P_{Y|X}(l|\boldsymbol{x})] \omega_{kl}^{(3)} \sigma_2'(\langle \boldsymbol{\omega}_k^{(2)}, \boldsymbol{t}_1 \rangle) t_{1n} \\ \frac{\partial \ell_{\text{CE}}}{\partial \omega_{mn}^{(1)}} &= \sum_{k=1}^K \sum_{l=1}^L [P_{\hat{Y}|X}(l|\boldsymbol{x}) - P_{Y|X}(l|\boldsymbol{x})] \omega_{kl}^{(3)} \sigma_2'(\langle \boldsymbol{\omega}_k^{(2)}, \boldsymbol{t}_1 \rangle) \omega_{nk}^{(2)} \sigma_1'(\langle \boldsymbol{\omega}_n^{(1)}, \boldsymbol{x} \rangle) x_m. \end{aligned} \quad (49)$$

486 Based on the above three equations, we can reformulate the derivatives as

$$\begin{aligned} \frac{\partial \ell_{\text{CE}}^*}{\partial \omega_{kl}^{(3)}} &= [P_{\hat{Y}|X}(l|\boldsymbol{x}) - P_{Y|X}(l|\boldsymbol{x})] \cdot t_{2k}, \\ \frac{\partial \ell_{\text{CE}}^\circ}{\partial \omega_{nk}^{(2)}} &= \sum_{l=1}^L \frac{\partial \ell_{\text{CE}}^*}{\partial \omega_{kl}^{(3)}} \cdot \omega_{kl}^{(3)} \cdot \frac{\sigma_2'(\langle \boldsymbol{\omega}_k^{(2)}, \boldsymbol{t}_1 \rangle)}{t_{2k}} \cdot t_{1n} \\ \frac{\partial \ell_{\text{CE}}^\circ}{\partial \omega_{mn}^{(1)}} &= \sum_{k=1}^K \frac{\partial \ell_{\text{CE}}^\circ}{\partial \omega_{nk}^{(2)}} \cdot \omega_{nk}^{(2)} \cdot \frac{\sigma_1'(\langle \boldsymbol{\omega}_n^{(1)}, \boldsymbol{x} \rangle)}{t_{1n}} \cdot x_m. \end{aligned} \quad (50)$$

487 The above three equations indicates that  $\frac{\partial \ell_{\text{CE}}^*}{\partial \omega_{kl}^{(3)}}$  is a function of  $P_{Y|X}(l|\boldsymbol{x})$ ,  $\frac{\partial \ell_{\text{CE}}^\circ}{\partial \omega_{nk}^{(2)}}$  is a function of  $\frac{\partial \ell_{\text{CE}}^*}{\partial \omega_{kl}^{(3)}}$ , and

488  $\frac{\partial \ell_{\text{CE}}^\circ}{\partial \omega_{mn}^{(1)}}$  is a function of  $\frac{\partial \ell_{\text{CE}}^\circ}{\partial \omega_{nk}^{(2)}}$ . In addition, the back-propagation algorithm shows that

$$\begin{aligned} \omega_{mn}^{(1)}(s+1) &= \omega_{mn}^{(1)}(s) - \alpha \frac{\partial \ell_{\text{CE}}}{\partial \omega_{mn}^{(1)}(s)} \\ \omega_{nk}^{(2)}(s+1) &= \omega_{nk}^{(2)}(s) - \alpha \frac{\partial \ell_{\text{CE}}}{\partial \omega_{nk}^{(2)}(s)} \\ \omega_{kl}^{(3)}(s+1) &= \omega_{kl}^{(3)}(s) - \alpha \frac{\partial \ell_{\text{CE}}}{\partial \omega_{kl}^{(3)}(s)} \end{aligned} \quad (51)$$

489 where  $\alpha$  is the learning rate and  $s$  denotes the index of the  $s$ th learning iteration. Therefore,  $\omega(s+1)$  is  
490 determined by all the previous gradients  $\{\frac{\partial \ell_{\text{CE}}}{\partial \omega(s)}\}_{s=1}^S$  as  $\omega(0)$  is randomly initialized and  $\alpha$  is a constant.

491 Definition 1 indicates that the weights define the sample space  $\Omega_{T_i}$ , thus we can derive that the gradients  $\frac{\partial \ell_{\text{CE}}}{\partial \omega^{(i)}}$   
492 determine  $\Omega_{T_i}$ . As a result,  $\Omega_{T_i}$  is a function of  $\Omega_{T_{i+1}}$  and  $\Omega_{\hat{Y}}$  is a function of  $P(Y|X)$ . Based on Definition  
493 2, we can further derive that  $T_i$  is a function of  $T_{i+1}$  and  $\hat{Y}$  is a function of  $Y$ , i.e.,  $T_1 \leftarrow T_2 \leftarrow \hat{Y} \leftarrow Y$ .

## 494 **D The proof of $H(Y) = I(X; Y)$**

495 Given a training sample  $\boldsymbol{x}^j$  and the corresponding label  $y^j$ , the target distribution  $P_{Y|X}(y^j|\boldsymbol{x}^j)$  is commonly  
496 formulated as the one-hot format, i.e.,

$$P_{Y|X}(l|\boldsymbol{x}^j) = \begin{cases} 1 & \text{for } l = y^j \\ 0 & \text{for } l \neq y^j \end{cases} \quad (52)$$



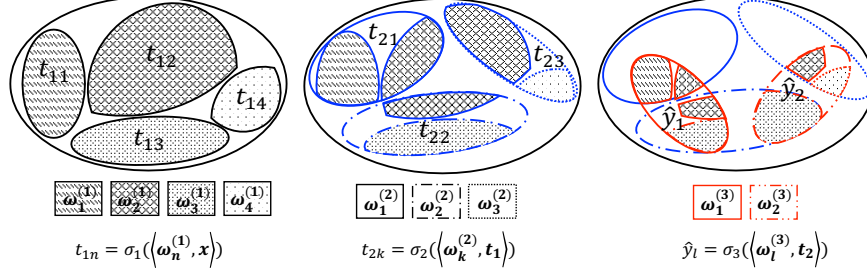

Figure 6: The graphical explanation for Corollary 1 based on the MLP =  $\{\mathbf{x}, \mathbf{t}_1, \mathbf{t}_2, \hat{\mathbf{y}}\}$ . The largest oval represents of the input  $\mathbf{x}$ , and each small shape indicates the representation capacity of a single feature. For example, if  $t_{12}$  is the largest activation, then the feature  $\omega_2^{(1)}$  has the largest cross-correlation to  $\mathbf{x}$ , i.e.,  $\omega_2^{(1)}$  has largest representation capacity. Therefore,  $\{\omega_n^{(1)}\}_{n=1}^4$  can be viewed as a representation of  $\mathbf{x}$ , and the representation capacity of  $\{\omega_n^{(1)}\}_{n=1}^4$  is measured by  $\{t_{1n}\}_{n=1}^4$ , which is visualized by the left figure. The blue ovals indicates the representation capacity of the three features  $\{\omega_k^{(2)}\}_{k=1}^3$  generated by combining the four features  $\{\omega_n^{(1)}\}_{n=1}^4$ . The two red ovals indicates the representation capacity of the two features  $\{\omega_l^{(3)}\}_{l=1}^2$  generated by combining the three features  $\{\omega_k^{(2)}\}_{k=1}^3$ .

497 As a result, the conditional entropy  $H(Y|X)$  can be formulated as

$$H(Y|X) = - \sum_{(\mathbf{x}^j, \mathbf{y}^j) \in \mathcal{D}} P_{X,Y}(\mathbf{x}^j, \mathbf{y}^j) \log P_{Y|X}(\mathbf{y}^j | \mathbf{x}^j) = 0. \quad (53)$$

498 Therefore, we can derive  $H(Y) = I(X; Y)$  because  $H(Y) = H(Y|X) + I(X; Y)$ .

## 499 E The detailed derivations and explanations for Corollary 1

500 Definition 1 indicates that  $\mathbf{t}_1 = \{t_{1n} = \sigma_1(\langle \omega_n^{(1)}, \mathbf{x} \rangle)\}_{n=1}^N$  defines  $N$  features of  $\mathbf{x}$ , namely  $\{\omega_n^{(1)}\}_{n=1}^N$ ,  
 501 thus  $\{\omega_n^{(1)}\}_{n=1}^N$  can be viewed as a representation of  $\mathbf{x}$ . In addition,  $\{t_{1n}\}_{n=1}^N$  measures the cross-correlation  
 502 between  $\{\omega_n^{(1)}\}_{n=1}^N$  and  $\mathbf{x}$ , (i.e., if  $\omega_n^{(1)}$  describes  $\mathbf{x}$  more accurately and comprehensively, then  $t_{1n}$  is larger.),  
 503 thus  $\{t_{1n}\}_{n=1}^N$  quantifies the representation capacity of  $\{\omega_n^{(1)}\}_{n=1}^N$ . For example, in Figure 6 (Left),  $\mathbf{t}_1$  defines  
 504 4 features to describe  $\mathbf{x}$  and  $t_{12}$  is the largest activation, thus  $\omega_2^{(1)}$  has the largest representation capacity of  $\mathbf{x}$ .

505 During inference, the second hidden layer  $\mathbf{t}_2$  will process  $\{t_{1n}\}_{n=1}^N$ , and  $t_{2k} = \sigma_2(\langle \omega_k^{(2)}, \mathbf{t}_1 \rangle)$  can be explained  
 506 to generating a new feature via combining all the features  $\{\omega_n^{(1)}\}_{n=1}^N$ , i.e.,

$$\{\omega_{1k}^{(2)} \otimes \omega_1^{(1)}, \dots, \omega_{Nk}^{(2)} \otimes \omega_N^{(1)}\}. \quad (54)$$

507 Since the new feature is the linear combination of  $\{\omega_n^{(1)}\}_{n=1}^N$ , it can be simply noted as

$$\{\omega_{1k}^{(2)}, \dots, \omega_{Nk}^{(2)}\} = \omega_k^{(2)}, \quad (55)$$

508 and the representation capacity of the new feature  $\omega_k^{(2)}$  is

$$t_{2k} = \omega_{1k}^{(2)} \cdot t_{11} + \dots + \omega_{Nk}^{(2)} \cdot t_{1N} \quad (56)$$

509 For example, if  $N = 4$  and  $K = 3$ , the representation capacity of the three new features is visualized by Figure  
 510 6 (Middle). Similarly,  $\hat{\mathbf{y}}$  generates  $L$  new features via combining all the features  $\{\omega_k^{(2)}\}_{k=1}^K$ .

$$\{\omega_{1l}^{(3)} \otimes \omega_1^{(2)}, \dots, \omega_{Kl}^{(3)} \otimes \omega_K^{(2)}\}. \quad (57)$$

511 Since the new feature is the linear combination of  $\{\omega_k^{(2)}\}_{k=1}^K$ , it can be simply noted as

$$\{\omega_{1l}^{(3)}, \dots, \omega_{Kl}^{(3)}\} = \omega_l^{(3)}, \quad (58)$$

512 and the representation capacity of the new feature  $\omega_l^{(3)}$  is

$$\hat{y}_l = \omega_{1l}^{(3)} \cdot t_{21} + \dots + \omega_{Kl}^{(3)} \cdot t_{2K} \quad (59)$$

513 For example, if  $L = 2$ , the representation capacity of the two new features is visualized by Figure 6 (Right).

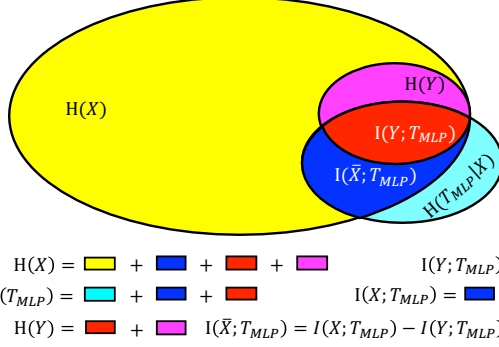

Figure 7: The Venn diagram of  $H(X)$ ,  $H(Y)$ , and  $I(X; T_{MLP})$ .

514 Overall, the inference phase is a procedure of feature combination, *i.e.*,  $\omega_l^{(3)}$  is a combination of  $\{\omega_k^{(2)}\}_{k=1}^K$ ,  
515 and  $\omega_k^{(2)}$  is a combination of  $\{\omega_n^{(1)}\}_{n=1}^N$ . Theorem 2 proves that the layer closer to output has more information  
516 of labels, *i.e.*,  $T_1 \leftarrow T_2 \leftarrow \hat{Y} \leftarrow Y$ , during training. Since the weights are fixed after training, the sample space  
517 and the distribution of hidden layers are fixed after training. Therefore, the information of  $Y$  transferred into  
518 hidden layers during training will retain there after training (*i.e.*, during inference), *i.e.*,  $T_1 \leftarrow T_2 \leftarrow \hat{Y} \leftarrow Y$   
519 characterizes the information flow of  $Y$  in the MLP in both training and inference phases.

520 For example, Figure 6 (Right) shows that the representation capacity of  $\omega_1^{(3)}$  is the weighted combination of  $t_{11}$ ,  
521  $t_{12}$ , and  $t_{13}$ , and the representation capacity of  $\omega_2^{(3)}$  is the weighted combination of  $t_{12}$ ,  $t_{13}$ , and  $t_{14}$ . Therefore,  
522  $\omega_2^{(1)}$  and  $\omega_3^{(1)}$  exist in both classes, *i.e.*, the low-level features in  $\mathbf{t}_1$  do not represent too much information of  
523 the labels, though we combine low-level features to generate high-level features for representing labels.

## 524 F The proof of Corollary 2

525 Based on the property of mutual information, we have

$$\begin{aligned}
 H(X) &= H(X|Y) + I(X; Y) \\
 &= H(X|Y) + H(Y) \quad (\text{Appendix D}) \\
 &= H(\bar{X}) + H(Y)
 \end{aligned} \tag{60}$$

526 where  $\bar{X}$  is the virtual random variable containing all the information of  $X$  except  $Y$ , namely  $H(\bar{X}) = H(X|Y)$ .

527 Therefore,  $I(X; T_{MLP})$  can be reformulated as

$$I(X; T_{MLP}) = I(\bar{X}; T_{MLP}) + I(Y; T_{MLP}). \tag{61}$$

528 The Venn diagram of  $H(X)$ ,  $H(Y)$ , and  $I(X; T_{MLP})$  are visualized in Figure 7. Corollary 1 indicates that all  
529 the information of  $\bar{X}$  and  $Y$  learned by a MLP retains in  $T_1$  and  $\hat{Y}$ , respectively. Therefore, we can derive

$$\begin{aligned}
 I(X; T_{MLP}) &= I(\bar{X}; T_1) + I(Y; \hat{Y}) \\
 I(Y; T_{MLP}) &= I(Y; \hat{Y})
 \end{aligned} \tag{62}$$

## 530 G Studying non-parametric models for mutual information estimation

531 In this section, we use the synthetic dataset to show that non-parametric models are sensitive to hyper-parameters  
532 for mutual information estimation. In addition, we show that the proposed mutual information estimator derives  
533 more accurate mutual information estimation than non-parametric models. Furthermore, we demonstrate that  
534 one reason for non-parametric models deriving poor mutual information estimation is because activations do not  
535 satisfy the *i.i.d.* prerequisite of non-parametric models. The experiment codes are available online<sup>6</sup>.

### 536 G.1 Non-parametric models are sensitive to hyper-parameters

537 To show non-parametric models being sensitive to hyper-parameters, we choose two commonly used non-  
538 parametric models, namely the empirical distribution [35] and KDE [33], to measure the information flow in  
539 MLP1 and MLP2 defined in Table 1 on the synthetic dataset.

<sup>6</sup><https://github.com/Dlib-NeurIPS/Deep-Learning-Information-Theory>

Table 3: The hyper-parameters of empirical distributions and KDE

|              |       |      |     |     |     |     |     |      |
|--------------|-------|------|-----|-----|-----|-----|-----|------|
| $bs$         | 0.001 | 0.01 | 0.1 | 1.0 | 2.0 | 4.0 | 6.0 | 8.0  |
| $\sigma_n^2$ | 0.01  | 0.05 | 0.1 | 1.0 | 2.0 | 4.0 | 8.0 | 16.0 |

540 The empirical distribution is defined as

$$P(T = n) = \frac{1}{J} \mathbb{1}(\mathbf{t}, \mathbf{l}_n, \mathbf{r}_n) \quad (63)$$

541 where  $J$  is the number of samples,  $n$  denotes the  $n$ th bin,  $\mathbf{t}$  denotes an activation vector,  $\mathbf{l}_n$  and  $\mathbf{r}_n$  are the left  
542 and right boundary vectors, respectively. The indicator function  $\mathbb{1}(\mathbf{t}, \mathbf{l}_n, \mathbf{r}_n)$  is defined as

$$\mathbb{1}(\mathbf{t}, \mathbf{l}_n, \mathbf{r}_n) = \begin{cases} 1 & \text{for } \mathbf{l}_n \leq \mathbf{t} < \mathbf{r}_n \\ 0 & \text{otherwise} \end{cases} \quad (64)$$

543 Given a specific range, the hyper-parameter of the empirical distribution is the bin size, namely  $bs = |\mathbf{r}_n - \mathbf{l}_n|$ .  
544 Based on the empirical distribution, Tishby *et al.* estimate  $I(X; T_i)$  and  $I(Y; T_i)$  (see Section 3.2 in [35]).

545 To estimate  $I(X; T_i)$  and  $I(Y; T_i)$  via KDE, Saxe *et al.* assume that the empirical distribution of input samples  
546 is the true distribution and the distribution of a hidden layer is a mixture of Gaussian. In addition, Saxe *et al.*  
547 regard a hidden layer as a deterministic function of input samples, thus the Gaussian noise  $\mathcal{N}(0, \sigma_n^2)$  is added  
548 into activations to avoid infinite mutual information, and  $I(X; T_i)$  is estimated as

$$I(X; T_i) \leq -\frac{1}{J} \sum_j \log \frac{1}{J} \sum_{j'} \exp\left(-\frac{\|\mathbf{t}_j^{(i)} - \mathbf{t}_{j'}^{(i)}\|_2^2}{2\sigma_n^2}\right) \quad (65)$$

549 where  $J$  is the number of samples,  $\mathbf{t}_j^{(i)}$  denote the activations vector of the  $i$ th hidden layer in response to the  
550 input sample  $\mathbf{x}^j$  (see Appendix B.1 in [33]). Therefore, the hyper-parameter of KDE is the noise variance  $\sigma_n^2$ .

551 Leveraging the same training method in Section 4.1, we achieves 100% training accuracy in MLP1 and MLP2  
552 on the synthetic dataset. We specify 8 different values for each hyper-parameter, namely  $bs$  and  $\sigma_n^2$ , in Table 3,  
553 and use the empirical distribution and KDE to estimate  $I(X; T_i)$  during training MLP1 and MLP2.

554 Figure 8 and 9 show that the empirical distribution is sensitive to the hyper-parameter, namely the bin size  $bs$ .  
555 Figure 8 shows that  $I(X; T_i)$  in different hidden layers of MLP1 converges to 1.5 as  $bs$  increases from 0.001 to  
556 8.0. Figure 9 shows that  $I(X; T_1)$ ,  $I(X; T_2)$ , and  $I(X; \hat{Y})$  in MLP2 converge to 1.2, 0.8, and 0.7, respectively,  
557 as  $bs$  increases from 0.001 to 8.0. Notably, since the synthetic dataset only has 2 bits information,  $I(X; T_i)$   
558 must be smaller than  $H(X) = 2$  bits. However, we observe that if  $bs < 1.0$ , the empirical distribution derives  
559  $I(X; T_i) > 2.0$  in both MLP1 and MLP2, thus the empirical distribution cannot correctly estimate  $I(X; T_i)$  in  
560 MLP1 and MLP2 on the synthetic dataset when  $bs < 1.0$ .

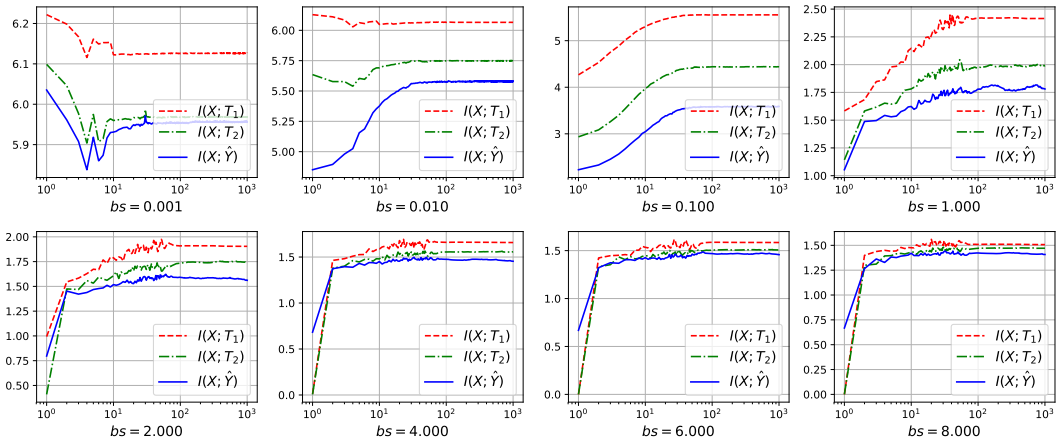

Figure 8: The estimation of  $I(X; T_i)$  in MLP1 on the synthetic dataset via the empirical distribution with 8 different  $bs$ . All the x-axis index training epochs.

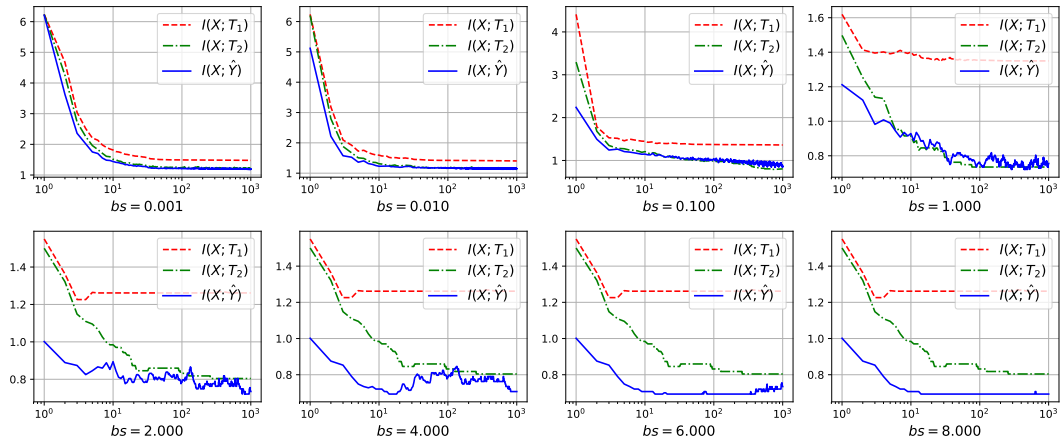

Figure 9: The estimation of  $I(X; T_i)$  in MLP2 on the synthetic dataset via the empirical distribution with 8 different  $bs$ . All the x-axis index training epochs.

561 Similarly, Figure 10 and 11 show that KDE is also sensitive to the hyper-parameter, namely the noise variance  
 562  $\sigma_n^2$ . Figure 10 shows that  $I(X; T_i)$  in different hidden layers of MLP1 converges to 2.0 as  $\sigma_n^2$  increases from  
 563 0.01 to 16.0. Figure 11 shows that KDE derives different  $I(X; T_1)$  and  $I(X; T_2)$  in MLP2 given different  
 564  $\sigma_n^2$ , except  $I(X; \hat{Y})$  converges to 1.0, as  $bs$  increases from 0.01 to 16.0. Again, since the synthetic dataset  
 565 only has 2 bits information,  $I(X; T_i)$  must be smaller than  $H(X) = 2$ . However, we also observe that KDE  
 566 derives  $I(X; T_i) > 2.0$  when  $\sigma_n^2 < 1.0$ . Overall, different  $\sigma_n^2$  make KDE to derive different mutual information  
 567 estimations for  $I(X; T_i)$  in MLP1 and MLP2 on the synthetic dataset, especially KDE does not correctly  
 568 estimate  $I(X; T_i)$  in MLP1 and MLP2 when  $\sigma_n^2 < 1.0$ .

569 In summary, the two non-parametric models are sensitive to hyper-parameters for mutual information estimation.  
 570 Especially, since the entropy of the synthetic dataset is known, we can determine which hyper-parameter is  
 571 appropriate to estimate the mutual information. However, if the entropy of dataset is unknown, it is very difficult  
 572 to choose an appropriate hyper-parameter for non-parametric models to estimate the mutual information.

## 573 G.2 Comparison to non-parametric models on the synthetic dataset

574 In this section, we compare the proposed mutual information estimator to the empirical distribution and KDE  
 575 in MLP1 and MLP2 on the synthetic dataset, and demonstrate that the proposed mutual information estimator  
 576 derives more accurate mutual information estimation than non-parametric models. Based on Appendix G.1,  
 577 we choose  $bs = 2.0$  and  $\sigma_n^2 = 2.0$  as the optimal hyper-parameters for the empirical distribution and KDE to  
 578 estimate  $I(X; T_i)$  and  $I(Y; T_i)$ . All the training methods are the same as Section 4.1.

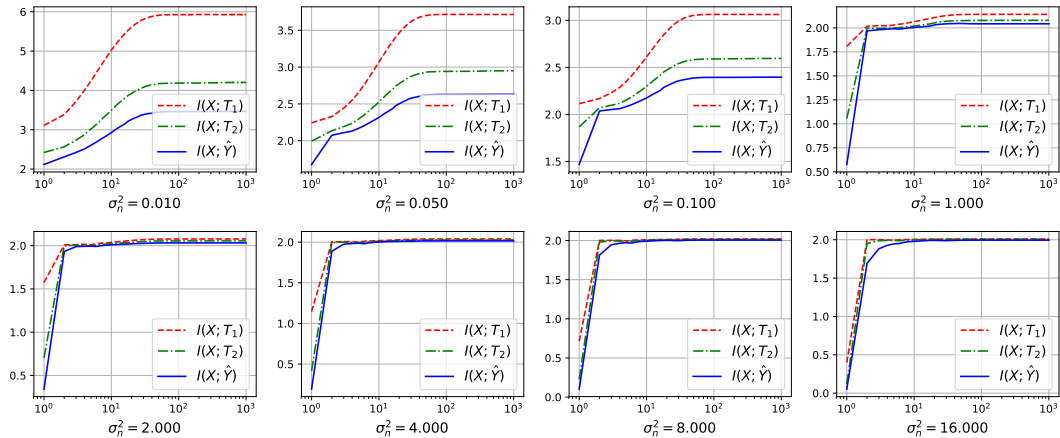

Figure 10: The estimation of  $I(X; T_i)$  in MLP1 on the synthetic dataset by KDE with 8 different  $\sigma_n^2$ . All the x-axis index training epochs.

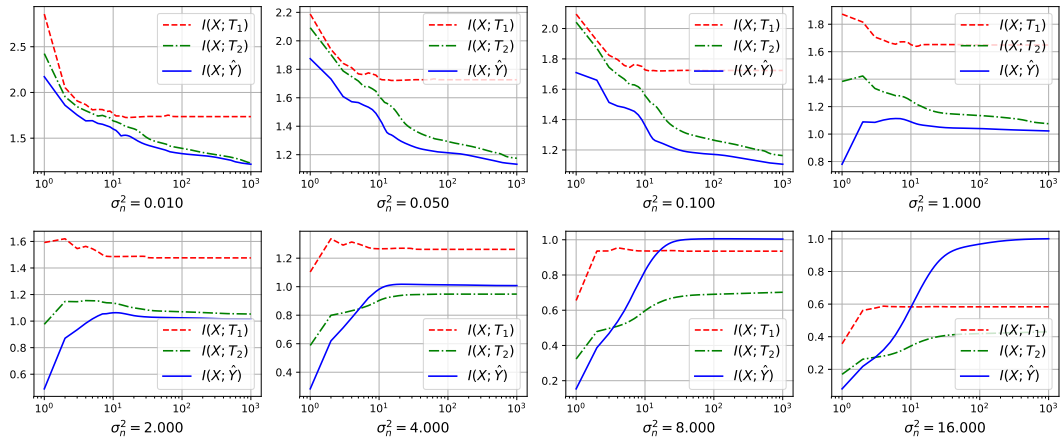

Figure 11: The estimation of  $I(X; T_i)$  in MLP2 on the synthetic dataset by KDE with 8 different  $\sigma_n^2$ . All the x-axis index training epochs.

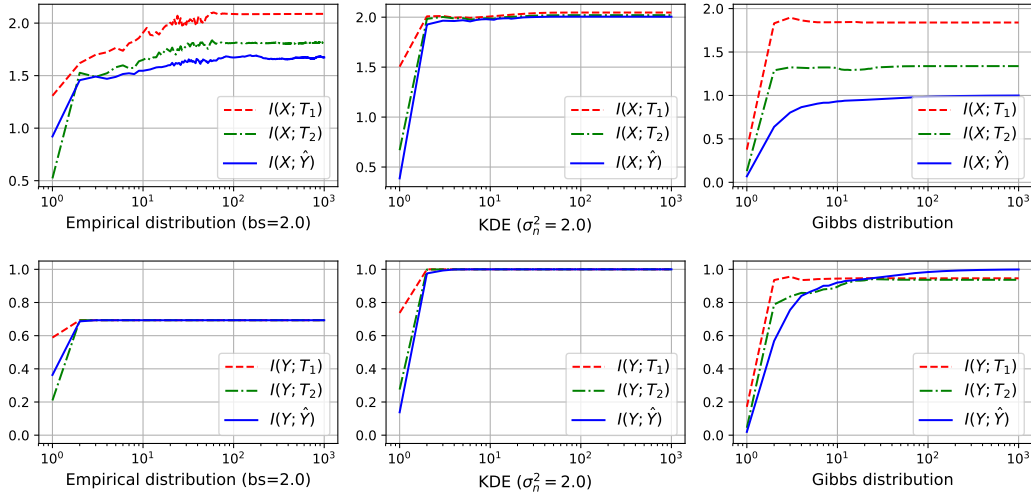

Figure 12: The estimation of  $I(X; T_i)$  and  $I(Y; T_i)$  in MLP1 based on the three mutual information estimators. All the x-axis index training epochs.

579 Figure 12 shows the estimation of  $I(X; T_i)$  and  $I(Y; T_i)$  in MLP1 derived by the three methods, namely the  
580 empirical distribution ( $bs = 2.0$ ), KDE ( $\sigma_n^2 = 2.0$ ), and the Gibbs distribution. Since  $\hat{y}$  only has two nodes,  
581 the maximal information of  $X$  that  $\hat{y}$  can have is 1 bit, i.e.,  $I(X; \hat{Y}) \leq 1$ , based on Definition 1. However,  
582 we observe that the empirical distribution derives  $I(X; \hat{Y}) > 1.5$  and KDE derives  $I(X; \hat{Y}) = 2.0$ , thus the  
583 empirical distribution and KDE do not accurately estimate  $I(X; \hat{Y})$ . In addition, since MLP1 correctly predicts  
584 all the labels of synthetic images, it should have all the information of the labels. However, we observe that the  
585 empirical distribution estimates  $I(Y; T_i) = 0.7$  bits, which contradicts the fact. As a comparison, the proposed  
586 method based on Gibbs distribution accurately estimate the information flow in MLP1.

587 Figure 13 shows the estimation of  $I(X; T_i)$  and  $I(Y; T_i)$  in MLP2 derived by the three methods. As shown in  
588 Figure 4, MLP2 quickly learns all the features of the synthetic dataset, thus  $I(X; T_i)$  should have an increasing  
589 trend as training epochs increases. However,  $I(X; T_i)$  estimated by the empirical distribution shows a decreasing  
590 trend, which contradicts the variation of the weights shown in Figure 4. Therefore, the empirical distribution  
591 does not accurately estimate  $I(X; T_i)$  in MLP2. In addition, Section 4.2 shows that Tanh hinders  $t_1$  from  
592 correctly recognizing the features of input, thus  $t_1$  in MLP2 does not contain too much information of  $X$ , i.e.,  
593  $I(X; T_1)$  is small. However, KDE estimates  $I(X; T_1) > 1.5$ , i.e.,  $t_1$  in MLP2 has most information of  $X$ .  
594 Therefore, KDE does not correctly measures the effect of activation functions on the mutual information.

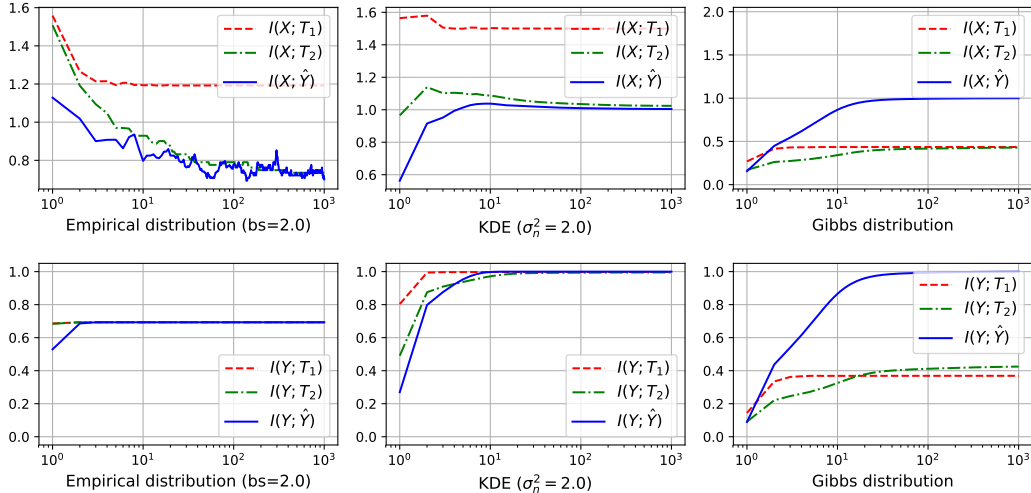

Figure 13: The estimation of  $I(X; T_i)$  and  $I(Y; T_i)$  in MLP2 based on the three mutual information estimators. All the x-axis index training epochs.

### 595 G.3 Activations do not satisfy the *i.i.d.* prerequisite of non-parametric models

596 In this section, we demonstrate that one reason for non-parametric models deriving poor mutual information  
597 estimation is because activations do not satisfy the *i.i.d.* prerequisite of non-parametric models.

598 Given an input  $\mathbf{x} \in \mathbb{R}^M$ , we define the corresponding multivariate random variable as  $X = [X_1, \dots, X_M]$ ,  
599 where  $X_m$  is the scalar-valued random variable of  $x_m$ . In the context of frequentist probability, all the parameters  
600 of MLPs are viewed as constants, thus the random variable of  $\langle \omega_n^{(1)}, \mathbf{x} \rangle = \sum_{m=1}^M \omega_{mn}^{(1)} \cdot x_m + b_{1n}$  is defined  
601 as  $G_{1n} = \sum_{m=1}^M \omega_{mn}^{(1)} X_m + b_{1n}$ , and the random variable of the activation  $t_{1n} = \sigma_1(\langle \omega_n^{(1)}, \mathbf{x} \rangle)$  is defined  
602 as  $T_{1n} = \sigma_1(G_{1n})$ . Therefore, the multivariate random variable of  $\mathbf{t}_1 = [t_{11}, \dots, t_{1N}]$  can be defined as  
603  $T_1 = [T_{11}, \dots, T_{1N}]$ . Similarly, we define the multivariate random variable of  $\mathbf{t}_2$  as  $T_2 = [T_{21}, \dots, T_{2K}]$  and  
604 the multivariate random variable of  $\hat{\mathbf{y}}$  as  $\hat{Y} = [\hat{Y}_1, \dots, \hat{Y}_L]$ .

605 Samples being *i.i.d.* is the prerequisite of applying non-parametric models, e.g. the empirical distribution and  
606 KDE, to model the true distribution of a random variable [40]. In the context of MLPs, most previous works  
607 regard the activations of a layer as the samples of the random variable of the layer, and use non-parametric  
608 models to simulate the distribution of the layer. As a result, activations must be *i.i.d.* samples.

609 Since the necessary condition for samples being *i.i.d.* is the samples being uncorrelated, we can use the sample  
610 correlation to examine if activations being *i.i.d.*. More specifically, given two *i.i.d.* input samples  $\mathbf{x}^j$  and  $\mathbf{x}^{j'}$ ,  
611 the two activation vectors of the  $i$ th hidden layers are  $\mathbf{t}_i^j$  and  $\mathbf{t}_i^{j'}$ . If  $\mathbf{t}_i^j$  and  $\mathbf{t}_i^{j'}$  are *i.i.d.* samples of  $T_i$ , the sample  
612 correlation  $R(\mathbf{t}_i^j, \mathbf{t}_i^{j'})$  must be zero, namely

$$R(\mathbf{t}_i^j, \mathbf{t}_i^{j'}) = \frac{\sum_{n=1}^N (t_{in}^j - \bar{t}_i^j)(t_{in}^{j'} - \bar{t}_i^{j'})}{\sqrt{\sum_{n=1}^N (t_{in}^j - \bar{t}_i^j)^2 \sum_{n=1}^N (t_{in}^{j'} - \bar{t}_i^{j'})^2}} = 0, \quad (66)$$

613 where  $\bar{t}_i^j = \frac{1}{N} \sum_{n=1}^N t_{in}^j$ , and  $N$  is the number of neurons in  $\mathbf{t}_i$ .

614 To study the sample correlation between activations given different samples, we use the Adam to train a MLP on  
615 the MNIST dataset [20] over 200 epochs with the learning rate  $\alpha = 0.0005$ . Since the dimension of each image  
616 is  $28 \times 28$ , the number of the input nodes is  $M = 784$ . In addition,  $\mathbf{t}_1$ ,  $\mathbf{t}_2$ , and  $\hat{\mathbf{y}}$  have  $N = 96$ ,  $K = 32$ , and  
617  $L = 10$  neurons/nodes, respectively. All the activation functions are Tanh.

618 After training, we derive  $R(\mathbf{t}_i^j, \mathbf{t}_i^{j'})$  on 5000 training samples  $\{\mathbf{x}^j\}_{j=1}^{5000}$  and show the result in Figure 14. In  
619 particular, we rearrange the order of  $\{\mathbf{x}^j\}_{j=1}^{5000}$  such that images with the same label have consecutive index, i.e.,  
620 images with the label  $l$  has the index  $[l \times 500, (l + 1) \times 500)$ , thus we can easily check the sample correlation  
621 between activations with the same label. Figure 14 shows that the sample correlation between activations with  
622 the same label becomes larger as the layer is closer to the output. In other words, activations are not *i.i.d.*.  
623 Therefore, it is invalid to apply non-parametric models to model the true distribution of all the layers of the MLP,  
624 because activations do not satisfy the *i.i.d.* prerequisite of non-parametric models.

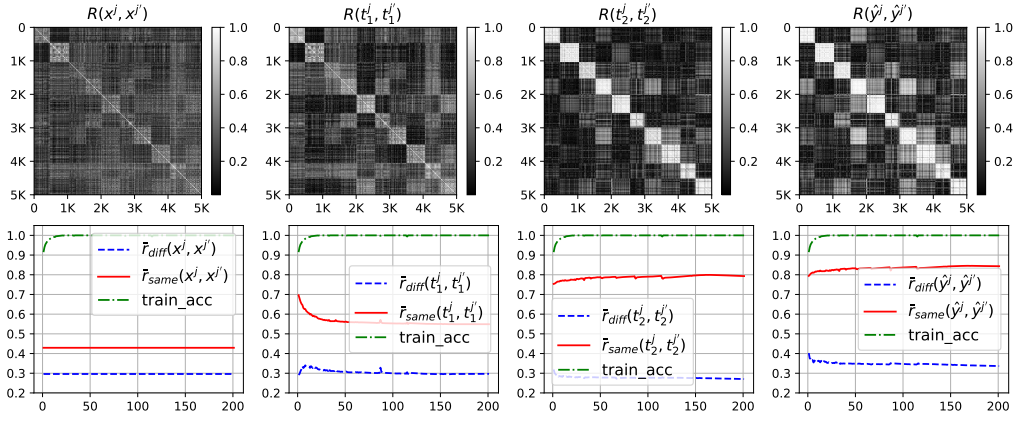

Figure 14: The first row shows that sample correlation between different samples/activations in each layer of the MLP after training. The second row shows the variation of the average sample correlation between different activations with different labels and with the same labels in each layer during training.

625 More specifically, Figure 14 shows that the sample correlation between each pair of training samples  $\{\mathbf{x}^j\}_{j=1}^{5000}$   
 626 is very small, thus *i.i.d.* can be viewed as a valid assumption for the input samples  $\{\mathbf{x}^j\}_{j=1}^{5000}$ . However, we  
 627 observe an ascending trend for the sample correlation between different activations with the same label as the  
 628 layer is closer to the output. For instance, the pixels at the top-left corner of  $R(\mathbf{t}_i^j, \mathbf{t}_i^{j'})$  becomes lighter as the  
 629 layer is closer to the output, i.e., the sample correlation between the activations with the label 0 becomes larger.

630 In addition, the second row of Figure 14 also show the ascending trend, i.e.,  $\bar{r}_{\text{same}}(\mathbf{t}_1^j, \mathbf{t}_1^{j'})$ ,  $\bar{r}_{\text{same}}(\mathbf{t}_2^j, \mathbf{t}_2^{j'})$ , and  
 631  $\bar{r}_{\text{same}}(\hat{\mathbf{y}}^j, \hat{\mathbf{y}}^{j'})$  converge to 0.55, 0.79, and 0.84, respectively, where  $\bar{r}_{\text{same}}(\mathbf{t}_i^j, \mathbf{t}_i^{j'})$  denotes the average sample  
 632 correlation of  $\{\mathbf{t}_i^j\}_{j=1}^{5000}$  with the same label in the  $i$ th hidden layer.

633 As a comparison, Figure 14 shows that the sample correlation of activations with different labels being relatively  
 634 stable in different layers, because  $\bar{r}_{\text{diff}}(\mathbf{t}_1^j, \mathbf{t}_1^{j'})$ ,  $\bar{r}_{\text{diff}}(\mathbf{t}_2^j, \mathbf{t}_2^{j'})$ , and  $\bar{r}_{\text{diff}}(\hat{\mathbf{y}}^j, \hat{\mathbf{y}}^{j'})$  converge to 0.29, 0.27, and 0.33,  
 635 respectively, where  $\bar{r}_{\text{diff}}(\mathbf{t}_i^j, \mathbf{t}_i^{j'})$  denotes the average sample correlation of  $\{\mathbf{t}_i^j\}_{j=1}^{5000}$  with different labels.

636 In summary, the sample correlation of activations with the same label becomes larger as the layer is closer to the  
 637 output, thus activations being *i.i.d.* is not valid for all the layers of the MLP. As a result, non-parametric models,  
 638 e.g., the empirical distribution and KDE, cannot correctly simulate the true distribution of all the layers, thus  
 639 they are invalid for estimating the mutual information between each layer and dataset.

## 640 H Experiments on benchmark dataset

641 To further demonstrate the information theoretic explanations for DNNs, we design more complicated neural  
 642 networks and conduct experiments on the benchmark MNIST and Fashion-MNIST (abbr. FMNIST) dataset. The  
 643 experiment codes are also available online<sup>7</sup>.

### 644 H.1 Experiments on the MNIST dataset

645 We design three MLPs, namely MLP4, MLP5, and MLP6, and summarize the architectures of the three MLPs in  
 646 Table 4. We train the three MLPs on the MNIST dataset by Adam [15] over 500 epochs with the learning rate  
 647  $\alpha = 0.0005$ . Based on the mutual information estimator proposed in Section 4.1, we measure the information  
 648 flow in the three MLPs during 500 training epochs.

649 In Figure 15, we observe that the information flow of  $X$  in the three MLPs does not satisfy the Markov chain,  
 650 namely Equation (2), proposed by previous works, i.e., we further confirm that Equation (2) does not fully  
 651 characterize the information flow of  $X$ , especially when taking into account of the back-propagation training.

652 Moreover, the second and the third row of Figure 15 show  $I(\bar{X}; T_1) \geq I(\bar{X}; T_2) \geq I(\bar{X}; \hat{Y})$  and  $I(Y; T_1) \leq$   
 653  $I(Y; T_2) \geq I(Y; \hat{Y})$  in all the three MLPs, which further validate that Corollary 1, i.e., Equation (14), correctly  
 654 characterizes the information flow in MLPs.

655 The last row of Figure 15 shows that  $I(X; T_{\text{MLP}}) > H(Y)$  and  $I(Y; T_{\text{MLP}}) = H(Y)$  for most epochs in all the  
 656 three MLPs. Though  $H(X)$  is unknown for the MNIST dataset, we still can conclude that the three MLPs form  
 657 three compressed representations of the data while preserve all the information of the labels. Hence, Figure 15  
 658 further confirms that a MLP satisfies the IB principle no matter what the architecture of the MLP is.

<sup>7</sup><https://github.com/Dlib-NeurIPS/Deep-Learning-Information-Theory>

Table 4: The number of neurons(nodes) and the activation function in MLP4 - MLP6

|      | $x$                    | $t_1$ | $t_2$ | $\hat{y}$ | $\sigma(\cdot)$                                    |
|------|------------------------|-------|-------|-----------|----------------------------------------------------|
| MLP4 | 784 ( $28 \times 28$ ) | 96    | 32    | 10        | $\text{ReLU}(z) = \max(0, z)$                      |
| MLP5 | 784 ( $28 \times 28$ ) | 96    | 32    | 10        | $\text{Tanh}(z) = (e^z - e^{-z}) / (e^z + e^{-z})$ |
| MLP6 | 784 ( $28 \times 28$ ) | 32    | 96    | 10        | ReLU                                               |

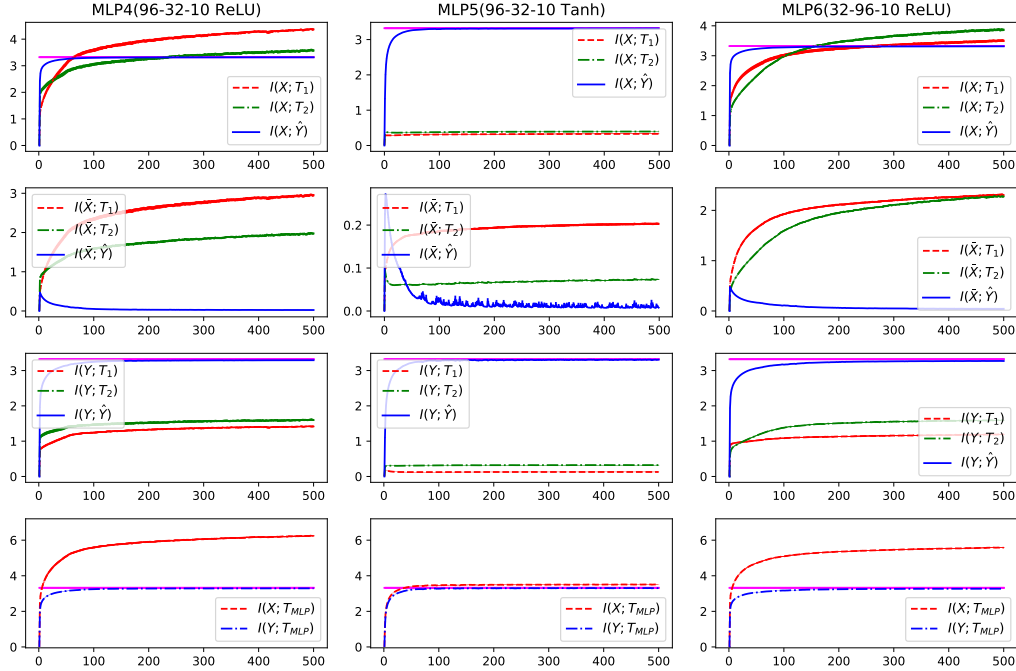

Figure 15: The information flow in MLP4, MLP5, and MLP6 on the MNIST dataset. All the x-axis index training epochs. In each column, the first three figures show  $I(X; T_i)$ ,  $I(\bar{X}; T_i)$ , and  $I(Y; T_i)$  respectively. The forth figure shows  $I(X; T_{MLP})$  and  $I(Y; T_{MLP})$  in a MLP. The pink line denotes  $H(Y) = \log_2 10$ .

659 **H.2 Experiments on the Fashion-MNIST dataset**

660 We design three MLPs, namely MLP7, MLP8, and MLP9, and summarize the architectures of the three MLPs in  
 661 Table 5. Compared to the MLPs on the MNIST dataset, the three MLPs has one more hidden layer and each  
 662 hidden layer has more neurons, *i.e.*, the MLPs are more complicated. Similarly, we train the three MLPs by  
 663 Adam [15] over 500 epochs with the learning rate  $\alpha = 0.0005$ . Based on the mutual information estimator  
 664 proposed in Section 4.1, we measure the information flow in the three MLPs during 500 training epochs.

665 Figure 16 shows similar results as Section 4.3 and Section H.1, thus it further confirms the information theoretic  
 666 explanations for DNNs.

Table 5: The number of neurons(nodes) and the activation function in MLP7 - MLP9

|      | $x$                    | $t_1$ | $t_2$ | $t_3$ | $\hat{y}$ | $\sigma(\cdot)$                                    |
|------|------------------------|-------|-------|-------|-----------|----------------------------------------------------|
| MLP7 | 784 ( $28 \times 28$ ) | 256   | 128   | 96    | 10        | $\text{ReLU}(z) = \max(0, z)$                      |
| MLP8 | 784 ( $28 \times 28$ ) | 256   | 128   | 96    | 10        | $\text{Tanh}(z) = (e^z - e^{-z}) / (e^z + e^{-z})$ |
| MLP9 | 784 ( $28 \times 28$ ) | 96    | 128   | 256   | 10        | ReLU                                               |



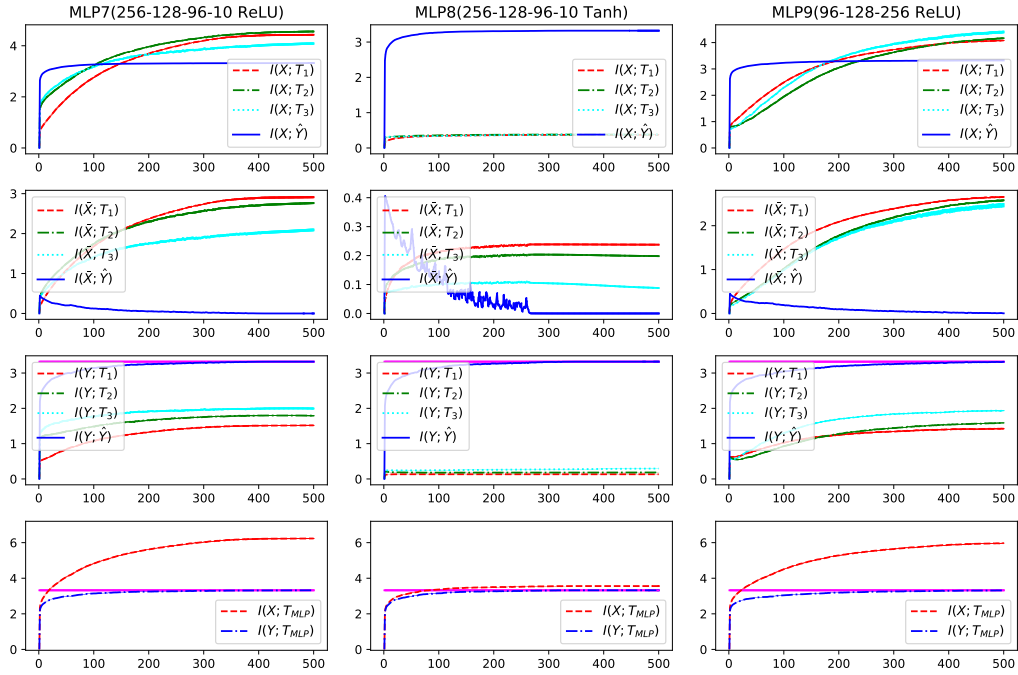

Figure 16: The information flow in MLP7, MLP8, and MLP9 on the MNIST dataset. All the x-axis index training epochs. In each column, the first three figures show  $I(X; T_i)$ ,  $I(\bar{X}; T_i)$ , and  $I(Y; T_i)$  respectively. The forth figure shows  $I(X; T_{MLP})$  and  $I(Y; T_{MLP})$  in a MLP. The pink line denotes  $H(Y) = \log_2 10$ .
